# Supplementary material
Source: PubMed Central journal article supplement (PMC4652278)
Supplement: tx5b00318_si_001.pdf [file tx5b00318_si_001.pdf]

## Supplementary Material

### **Comprehensive High Resolution Mass Spectrometric Analysis of DNA Phosphate Adducts Formed by the Tobacco-Specific Lung Carcinogen 4-(Methylnitrosamino)-1-(3-pyridyl)-1-butanone (NNK)**

Bin Ma, Peter W. Villalta, Adam T. Zarth, Delshanee Kotandeniya, Pramod Upadhyaya, Irina Stepanov, and Stephen S. Hecht\*

Masonic Cancer Center, University of Minnesota, Minneapolis MN 55455, U.S.A.

## Scheme S1. Synthetic route for CpopC

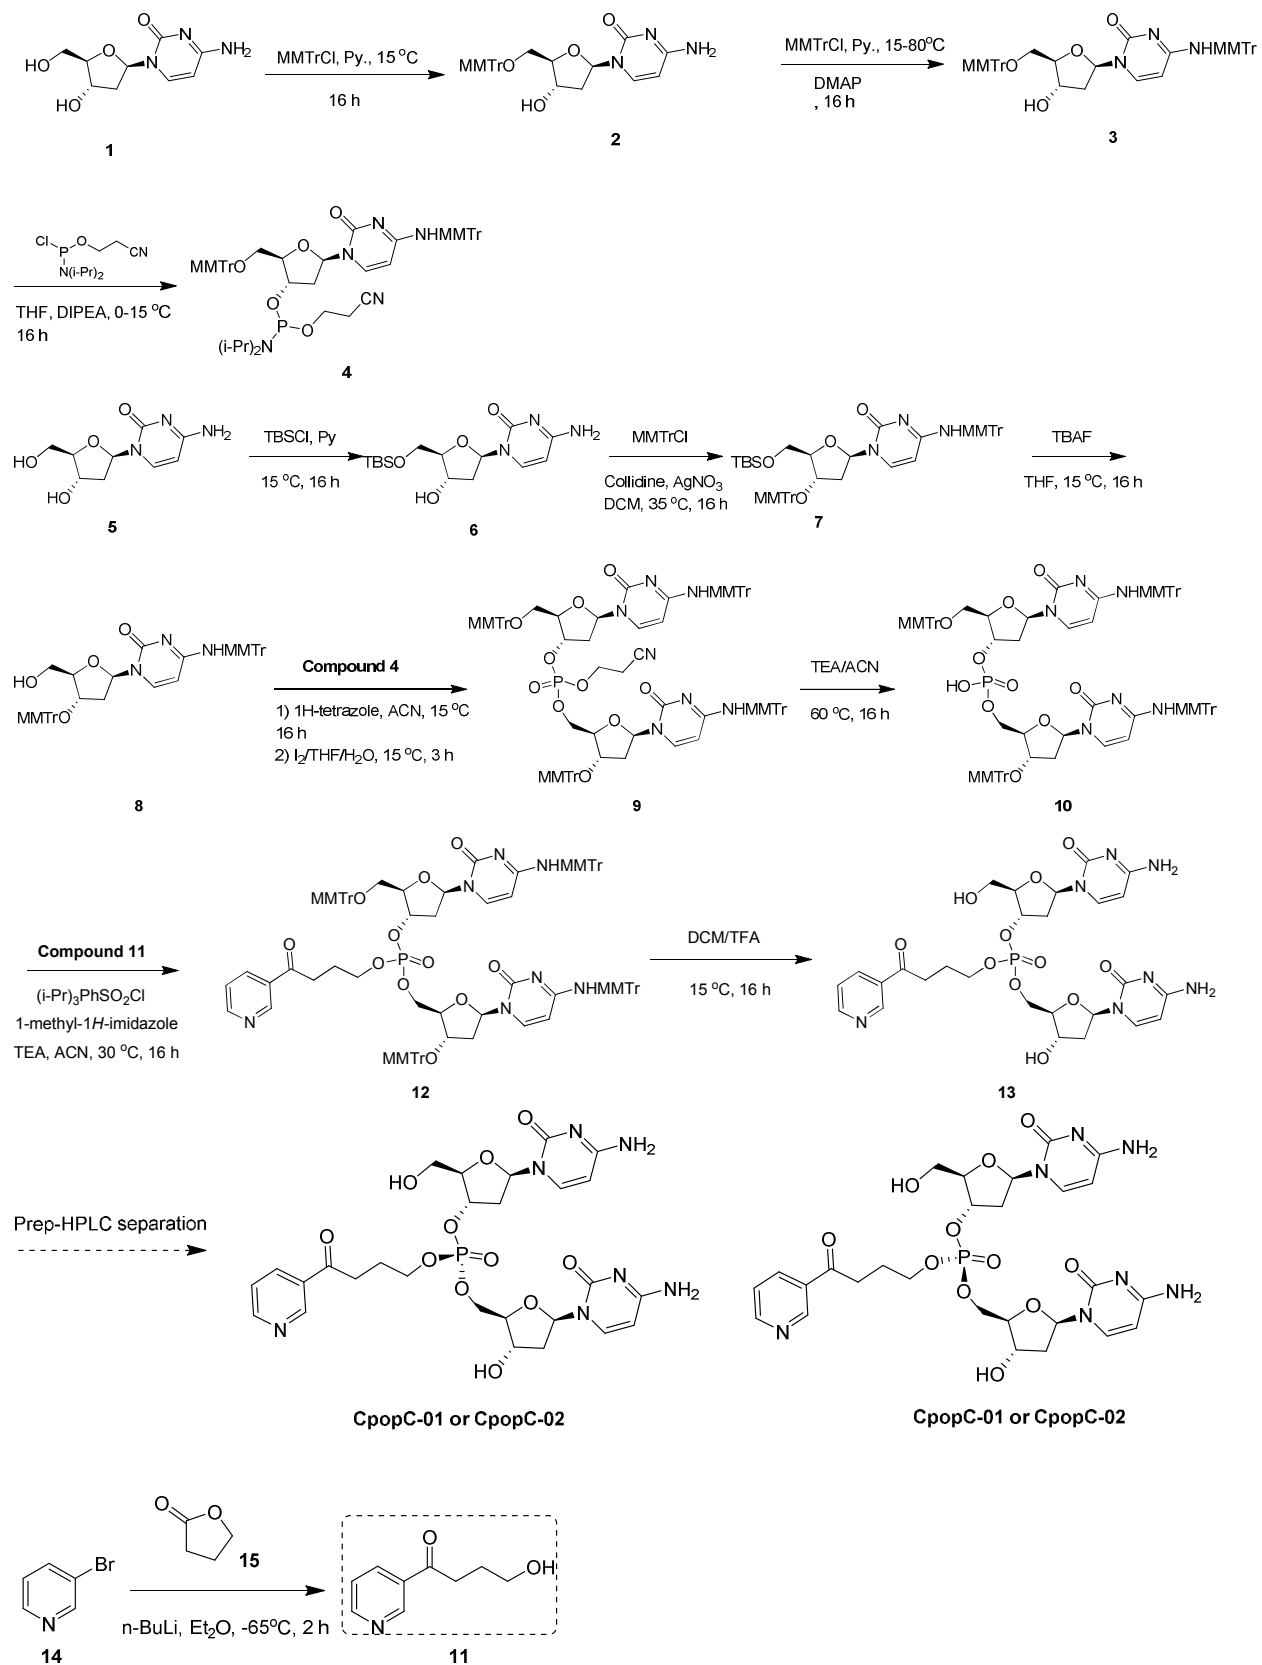

**Figure S1.** 1D and 2D NMR of CpopC

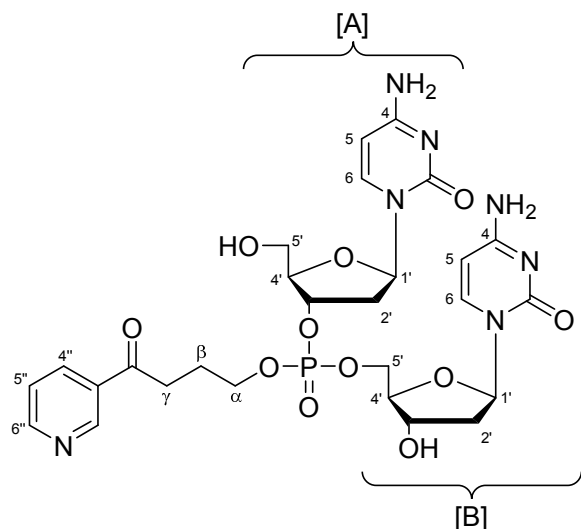

### **CpopC-1**

$^1\text{H}$  NMR (500 MHz,  $\text{DMSO-}d_6$ )  $\delta$  ppm 1.97 - 2.05 (m, 3 H,  $\text{C}\beta\text{-H}_2$ ,  $\text{C}2'\text{-H[B]}$ ) 2.11 - 2.22 (m, 2 H,  $\text{C}2'\text{-H[B]}$ ,  $\text{C}2'\text{-H[A]}$ ) 2.39 - 2.44 (m, 1 H,  $\text{C}2'\text{-H[A]}$ ) 3.20 (t,  $J = 7.02$  Hz, 2 H,  $\text{C}\gamma\text{-H}_2$ ) 3.56 - 3.61 (m, 2 H,  $\text{C}5'\text{-H}_2[\text{A}]$ ) 3.91 - 3.95 (m, 1 H,  $\text{C}4'\text{-H[B]}$ ) 4.06 - 4.09 (m, 1 H,  $\text{C}4'\text{-H[A]}$ ) 4.10 - 4.17 (m, 3 H,  $\text{C}\alpha\text{-H}_2$ ,  $\text{C}5'\text{-H[B]}$ ) 4.17 - 4.25 (m, 2 H,  $\text{C}5'\text{-H[B]}$ ,  $\text{C}3'\text{-H[B]}$ ) 4.93 - 4.97 (m, 1 H,  $\text{C}3'\text{-H[A]}$ ) 5.16 (t,  $J = 5.34$  Hz, 1 H,  $\text{C}5'\text{-OH[A]}$ ) 5.41 (d,  $J = 4.27$  Hz, 1 H,  $\text{C}3'\text{-OH[B]}$ ) 5.73 - 5.77 (m, 2 H,  $\text{C}5\text{-H[A]}$ ,  $\text{C}5\text{-H[B]}$ ) 6.17 - 6.23 (m, 2 H,  $\text{C}1'\text{-H[A]}$ ,  $\text{C}1'\text{-H[B]}$ ) 7.09 - 7.23 (br. m., 4 H,  $\text{C}4\text{-NH}_2[\text{A}]$ ,  $\text{C}4\text{-NH}_2[\text{B}]$ ) 7.55 - 7.59 (m, 1 H,  $\text{C}5''\text{-H}$ ) 7.61 (d,  $J = 7.32$  Hz, 1 H,  $\text{C}6\text{-H[A/B]}$ ) 7.77 (d,  $J = 7.63$  Hz, 1 H,  $\text{C}6\text{-H[A/B]}$ ) 8.27 - 8.32 (m, 1 H,  $\text{C}4''\text{-H}$ ) 8.78 - 8.81 (m, 1 H,  $\text{C}6''\text{-H}$ ) 9.12 - 9.14 (m, 1 H,  $\text{C}2''\text{-H}$ ).

# CpopC-1

Acquisition Time (sec) 3.2768

Date Stamp

File Name

Frequency (MHz) 500.13

Original Points Count 32768

Receiver Gain 186.69

Spectrum Type STANDARD

Nucleus 1H

Owner nmr

SW(cyclical) (Hz) 10000.00

Sweep Width (Hz) 9999.70

Number of Transients 32

Points Count 32768

Solvent DMSO-d6

Temperature (degree C) 25.128

Origin spect

Pulse Sequence zg30

Spectrum Offset (Hz) 3088.5073

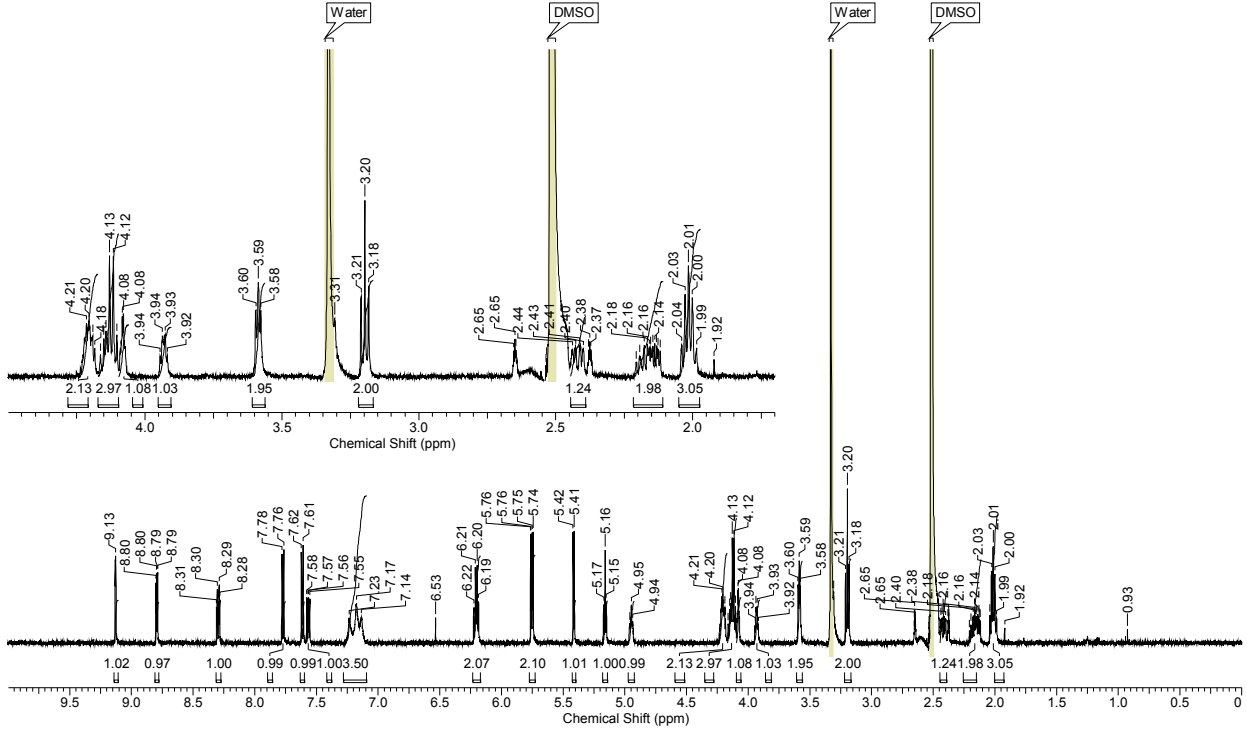

# CpopC-1

|                               |                      |                              |                    |                                      |
|-------------------------------|----------------------|------------------------------|--------------------|--------------------------------------|
| <b>Acquisition Time (sec)</b> | (0.2212, 0.1106)     | <b>Comment</b>               |                    |                                      |
| <b>Date</b>                   | 10 Feb 2015 07:23:36 | <b>File Name</b>             |                    |                                      |
| <b>Frequency (MHz)</b>        | (500.13, 500.13)     | <b>Nucleus</b>               | (1H, 1H)           | <b>Number of Transients</b> 4        |
| <b>Origin</b>                 | spect                | <b>Original Points Count</b> | (1024, 512)        | <b>Owner</b> nmr                     |
| <b>Points Count</b>           | (1024, 2048)         | <b>Pulse Sequence</b>        | cosygpppqf         | <b>Solvent</b> DMSO                  |
| <b>Spectrum Type</b>          | COSY                 | <b>Sweep Width (Hz)</b>      | (4625.11, 4627.37) | <b>Temperature (degree C)</b> 25.147 |
| <b>Title</b>                  |                      |                              |                    |                                      |

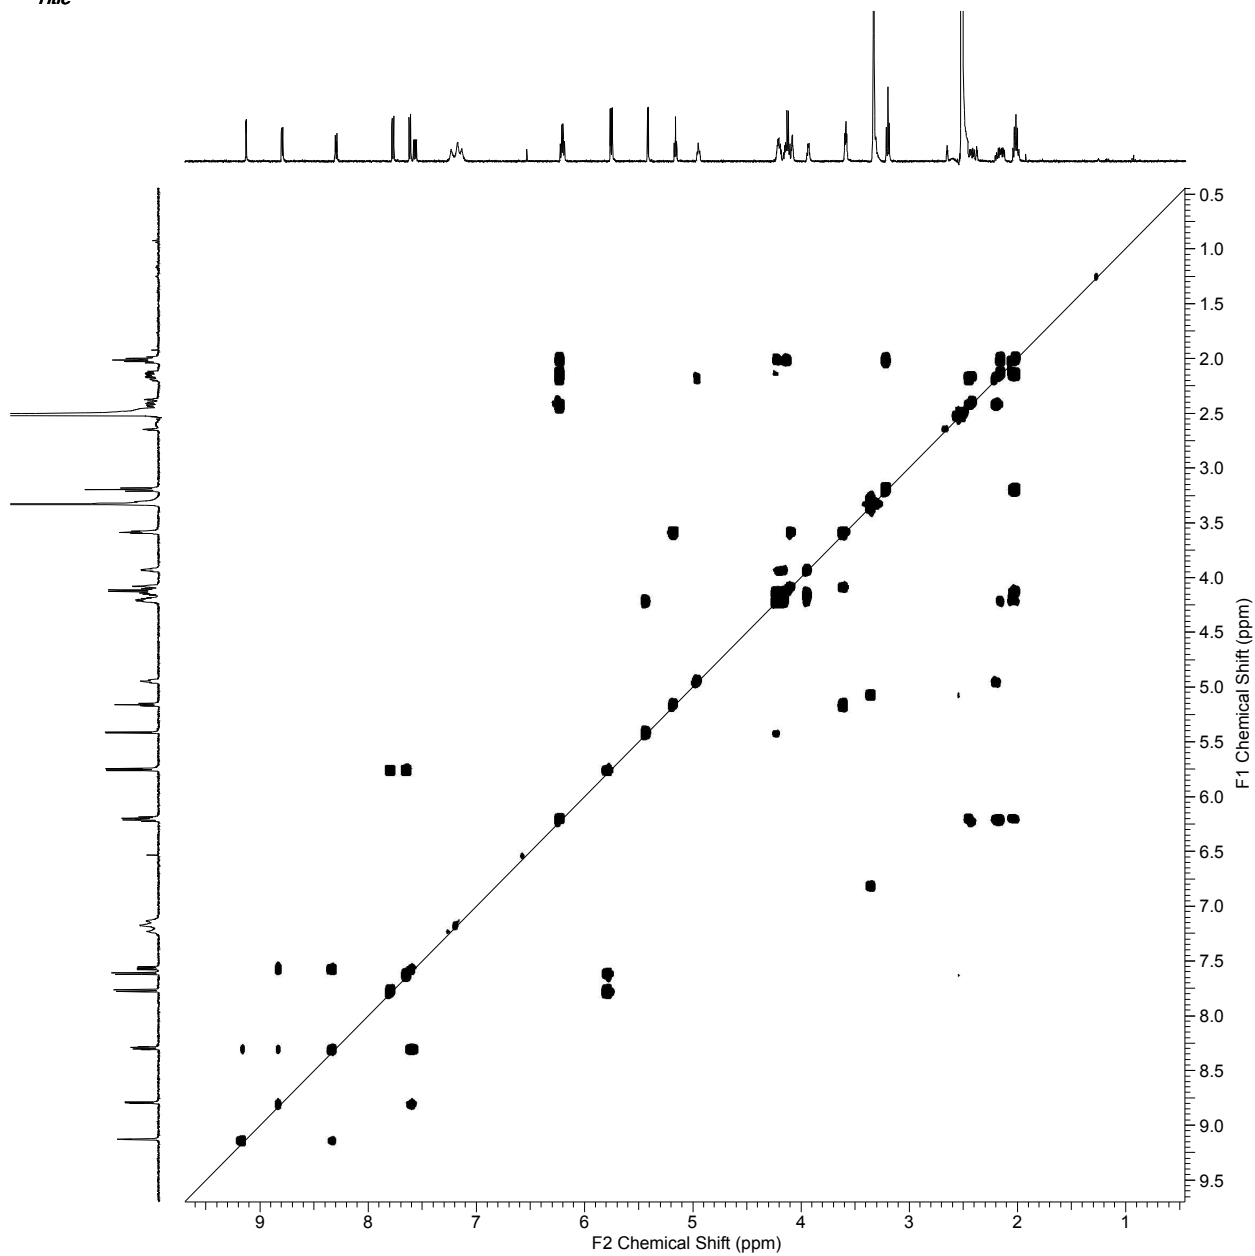

# CpopC-1

**Acquisition Time (sec)** (0.2150, 0.0062)

**Date**

**Frequency (MHz)** (500.13, 125.77)

**Origin** spect

**Points Count** (1024, 1024)

**Spectrum Type** HSQC

**Title**

**Comment**

**File Name**

**Nucleus** (1H, 13C)

**Original Points Count** (1024, 128)

**Pulse Sequence** hsqcedetgpsisp2.3

**Sweep Width (Hz)** (4757.25, 20726.63)

**Number of Transients** 16

**Owner** nmr

**Solvent** DMSO

**Temperature (degree C)** 25.269

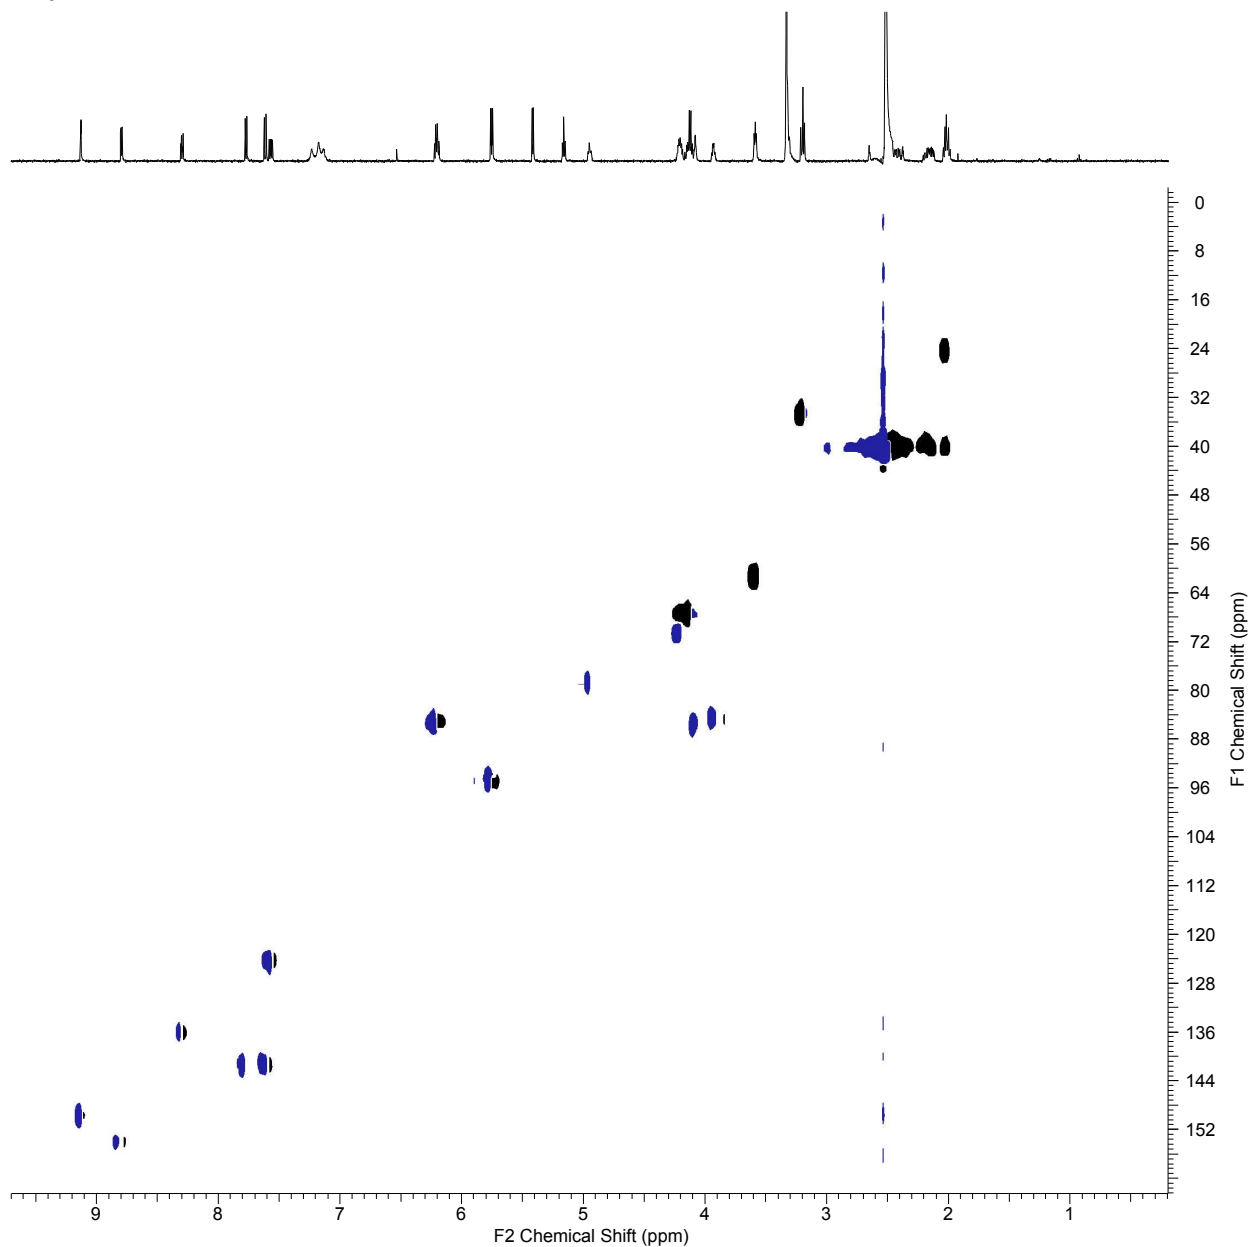

## CpopC-2

<sup>1</sup>H NMR (500 MHz, DMSO-*d*<sub>6</sub>) δ ppm 1.98 - 2.06 (m, 3 H, Cβ-H<sub>2</sub>, C2'-H[B]) 2.11 - 2.20 (m, 2 H, C2'-H[B], C2'-H[A]) 2.39 - 2.44 (m, 1 H, C2'-H[A]) 3.20 (t, *J* = 7.02 Hz, 2 H, Cγ-H<sub>2</sub>) 3.55 - 3.60 (m, 2 H, C5'-H<sub>2</sub>[A]) 3.91 - 3.95 (m, 1 H, C4'-H[B]) 4.06 - 4.09 (m, 1 H, C4'-H[A]) 4.09 - 4.17 (m, 3 H, Cα-H<sub>2</sub>, C5'-H[B]) 4.17 - 4.25 (m, 2 H, C5'-H[B], C3'-H[B]) 4.92 - 4.96 (m, 1 H, C3'-H[A]) 5.15 (t, *J* = 5.14 Hz, 1 H, C5'-OH[A]) 5.42 (d, *J* = 4.27 Hz, 1 H, C3'-OH[B]) 5.73 - 5.77 (m, 2 H, C5-H[A], C5-H[B]) 6.17 - 6.23 (m, 2 H, C1'-H[A], C1'-H[B]) 7.10 - 7.26 (br. m., 4 H, C4-NH<sub>2</sub>[A], C4-NH<sub>2</sub>[B]) 7.55 - 7.59 (m, 1 H, C5''-H) 7.62 (d, *J* = 7.32 Hz, 1 H, C6-H[A/B]) 7.77 (d, *J* = 7.63 Hz, 1 H, C6-H[A/B]) 8.28 - 8.32 (m, 1 H, C4''-H) 8.78 - 8.81 (m, 1 H, C6''-H) 9.12 - 9.15 (m, 1 H, C2''-H).

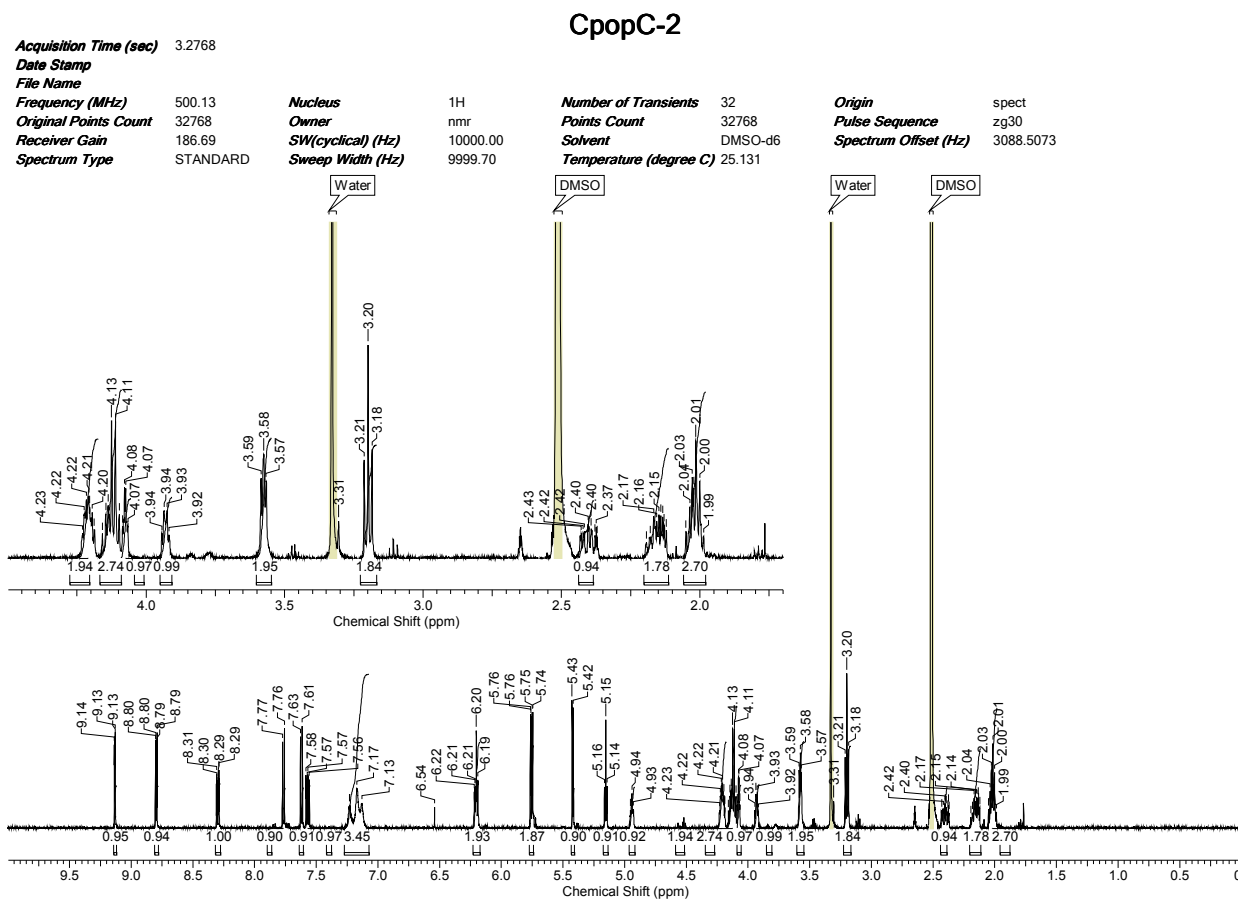

# CpopC-2

**Acquisition Time (sec)** (0.2417, 0.1208)

**Date**

**Frequency (MHz)** (500.13, 500.13)

**Origin** spect

**Points Count** (1024, 2048)

**Spectrum Type** COSY

**Title**

**Comment**

**File Name**

**Nucleus** (1H, 1H)

**Original Points Count** (1024, 512)

**Pulse Sequence** cosygpppqf

**Sweep Width (Hz)** (4233.15, 4235.22)

**Number of Transients** 4

**Owner** nmr

**Solvent** DMSO

**Temperature (degree C)** 25.145

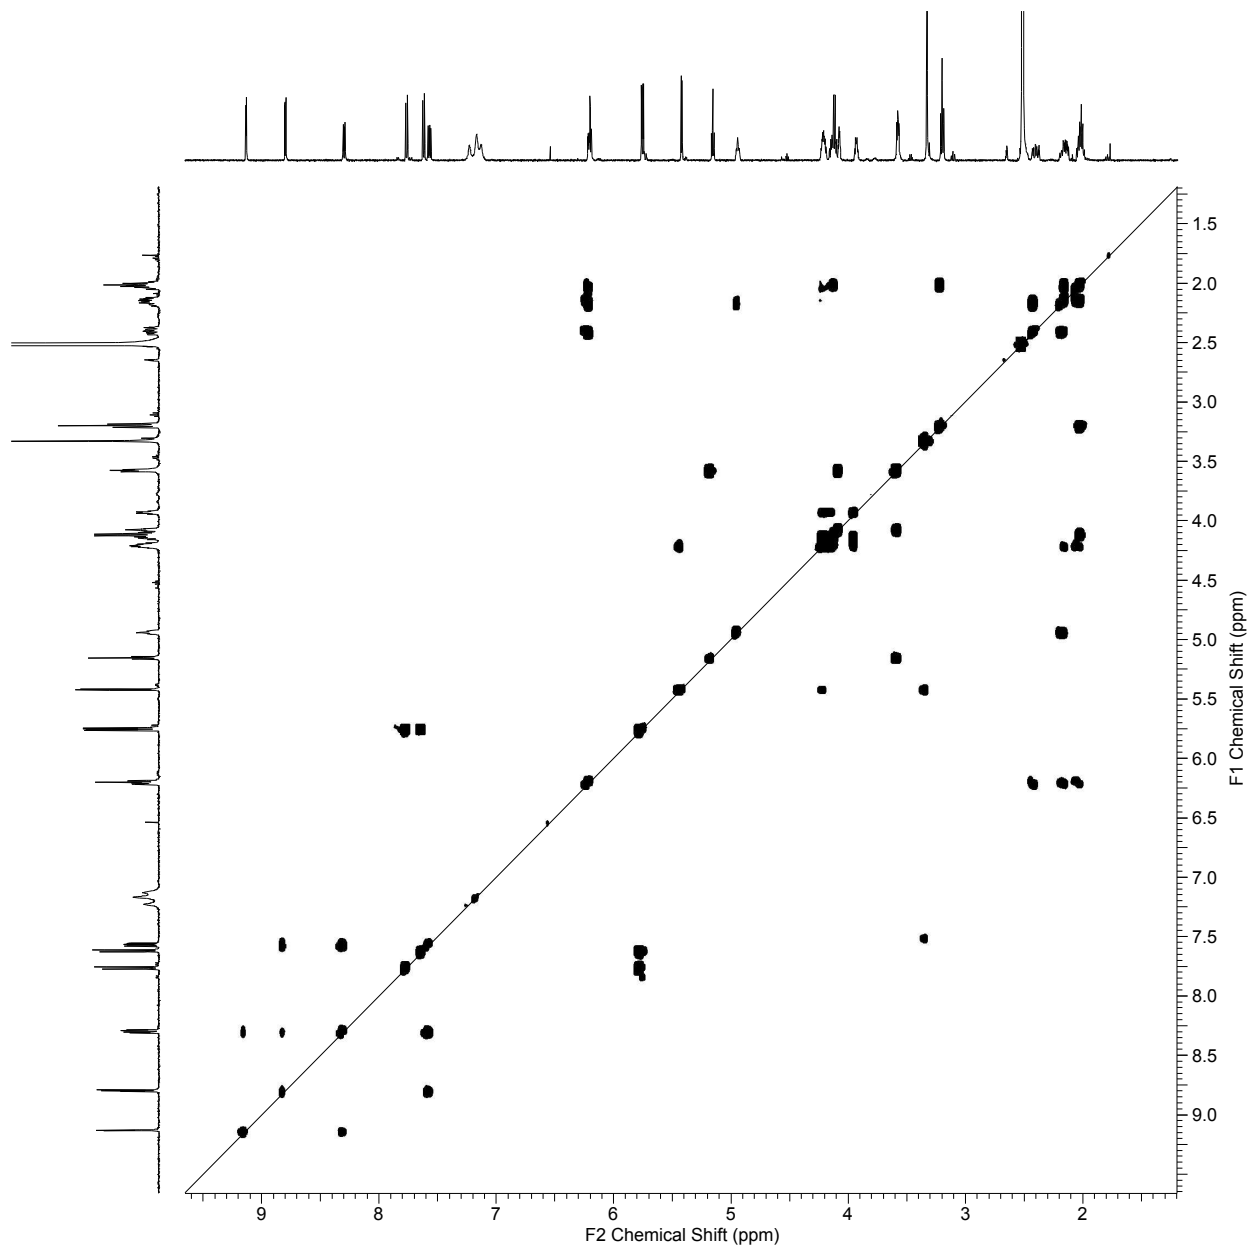



# CpopC-2

**Acquisition Time (sec)** (0.2437, 0.0062)  
**Date**  
**Frequency (MHz)** (500.13, 125.77)  
**Origin** spect  
**Points Count** (1024, 1024)  
**Spectrum Type** HSQC  
**Title** CpopC - P3

**Comment**  
**File Name**  
**Nucleus** (1H, 13C)  
**Original Points Count** (1024, 128)  
**Pulse Sequence** hsqcedetgppisp2.3  
**Sweep Width (Hz)** (4197.58, 20726.63)  
**Number of Transients** 16  
**Owner** nmr  
**Solvent** DMSO  
**Temperature (degree C)** 25.332

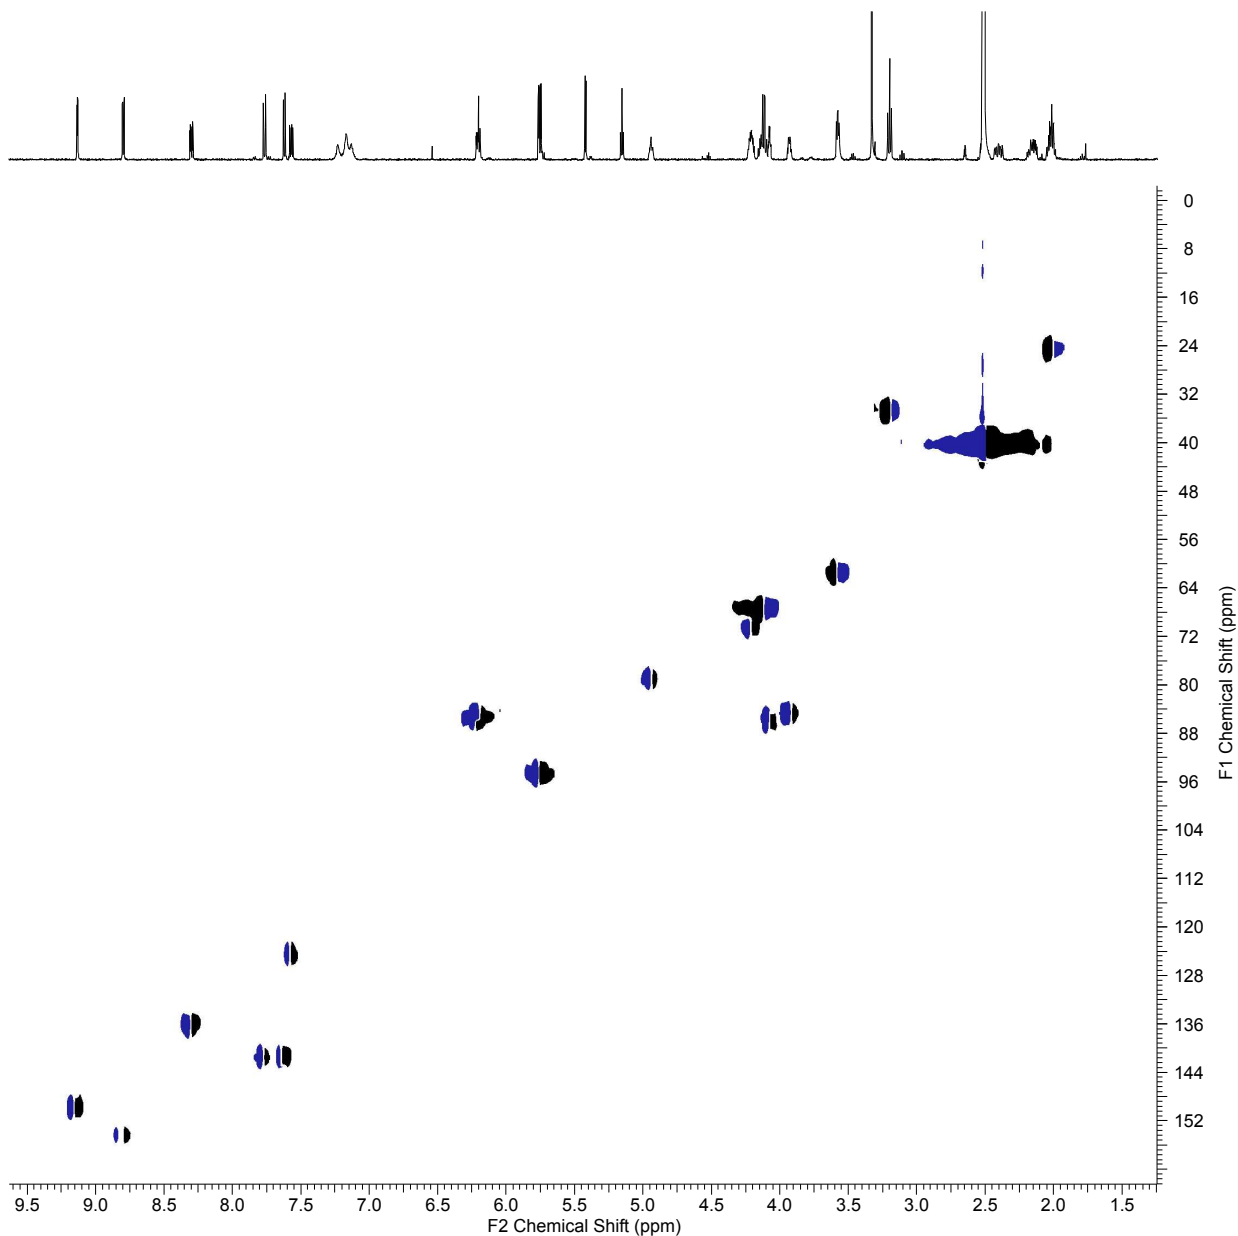

**Scheme S2.** Synthetic route of [ $^{15}\text{N}_3$ ]2'-dCpdC.

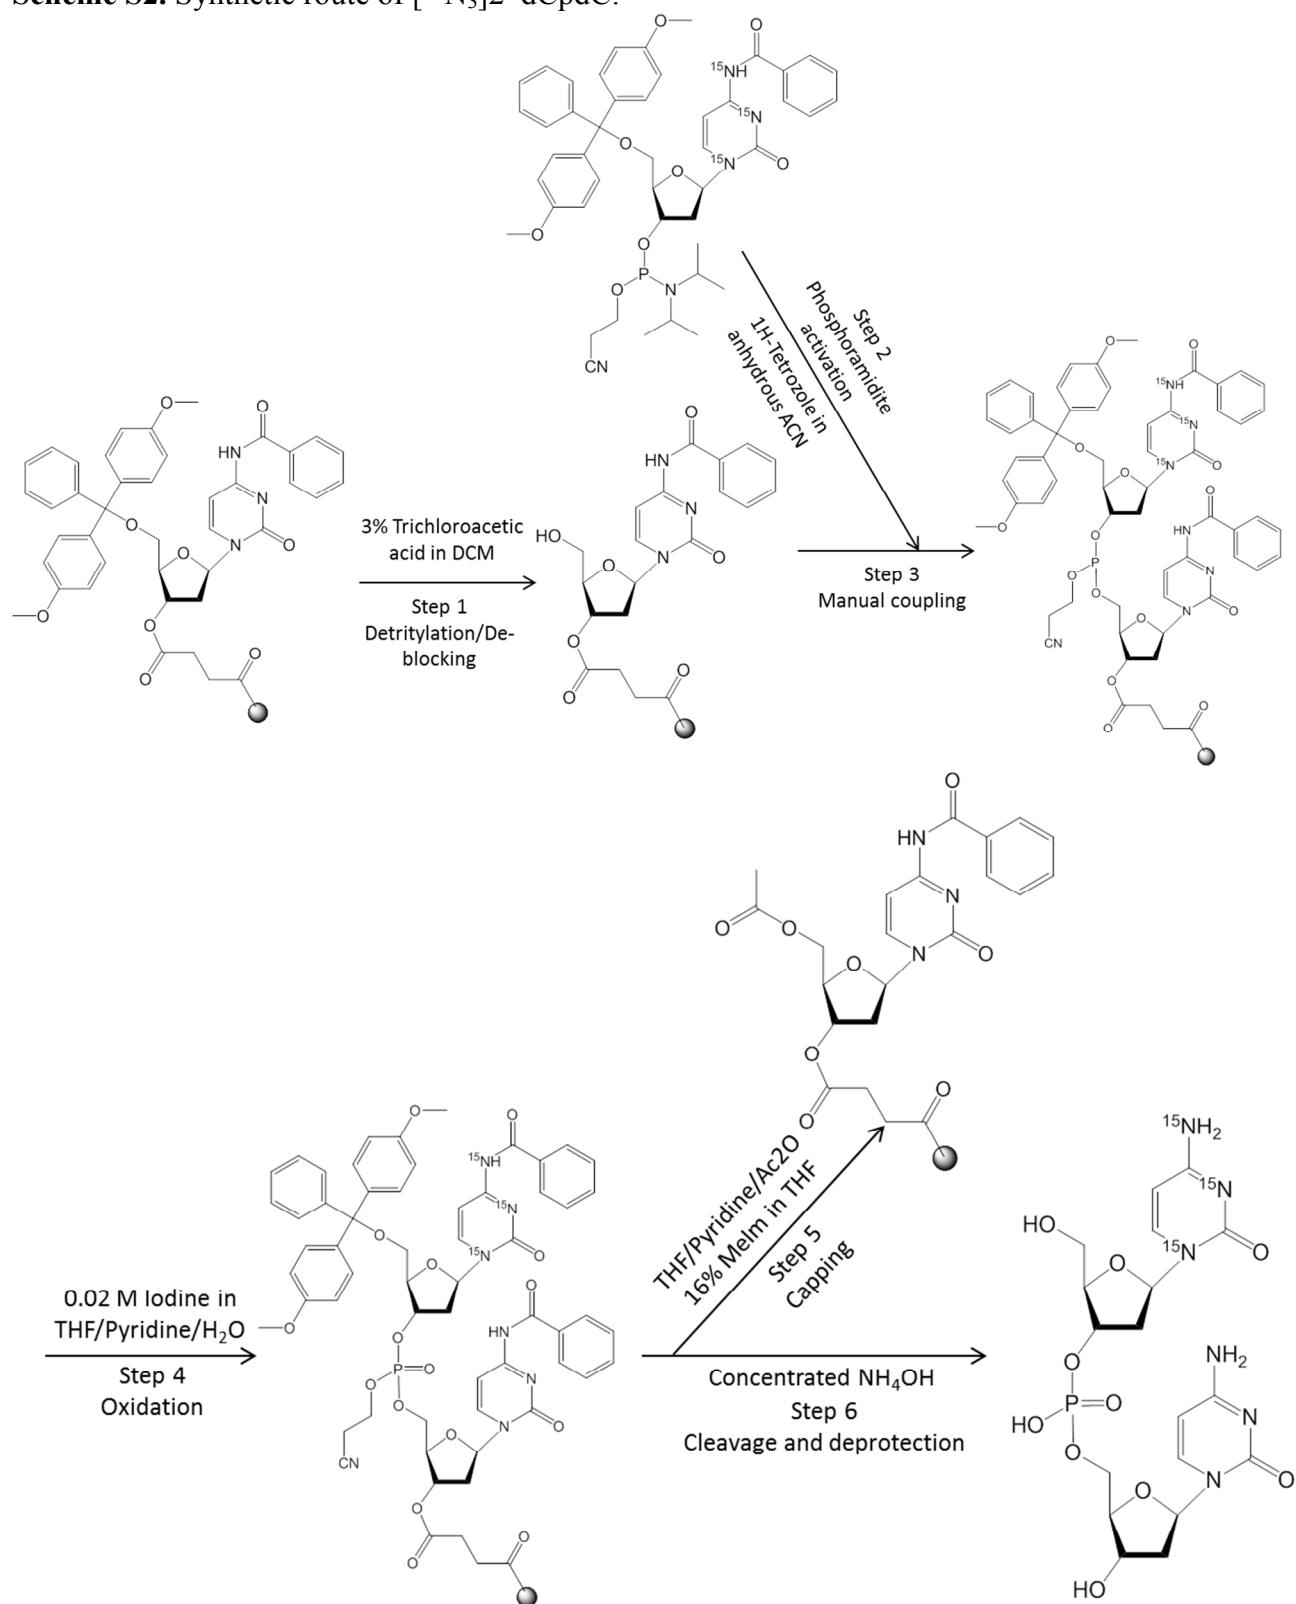

**Figure S2.** Extracted ion chromatograms (EIC) of CpopC and [<sup>15</sup>N<sub>3</sub>]CpopC obtained from full scan and product ion scan.

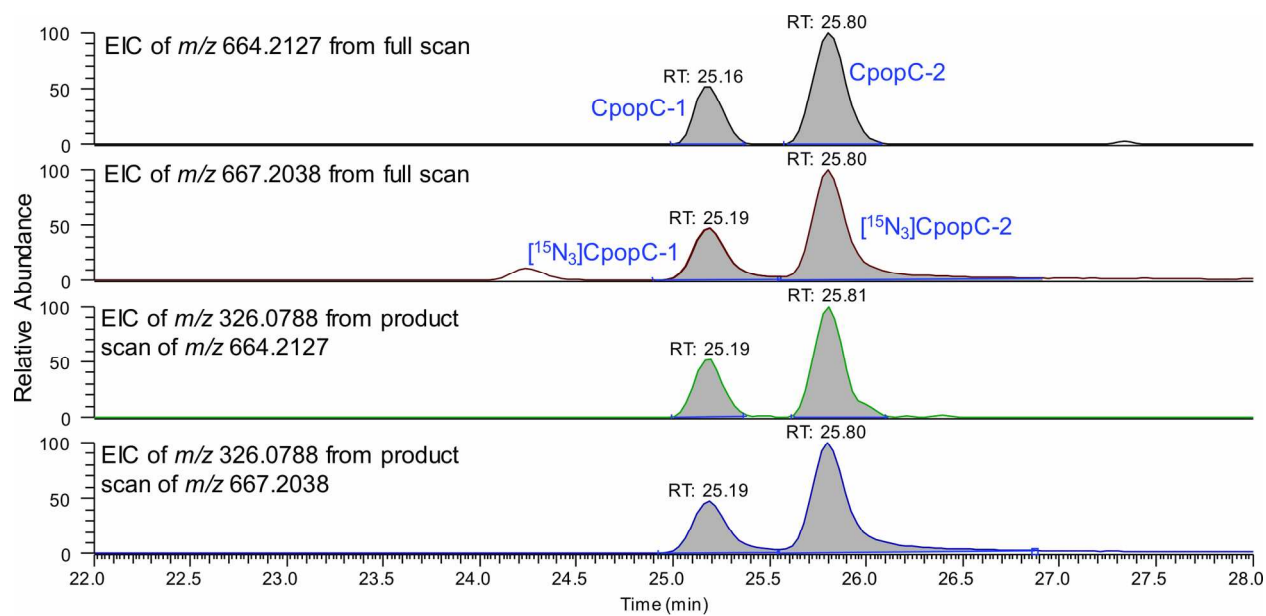

**Figure S3.** The product ion spectra and fragmentation pattern of four isomers of ApopC.

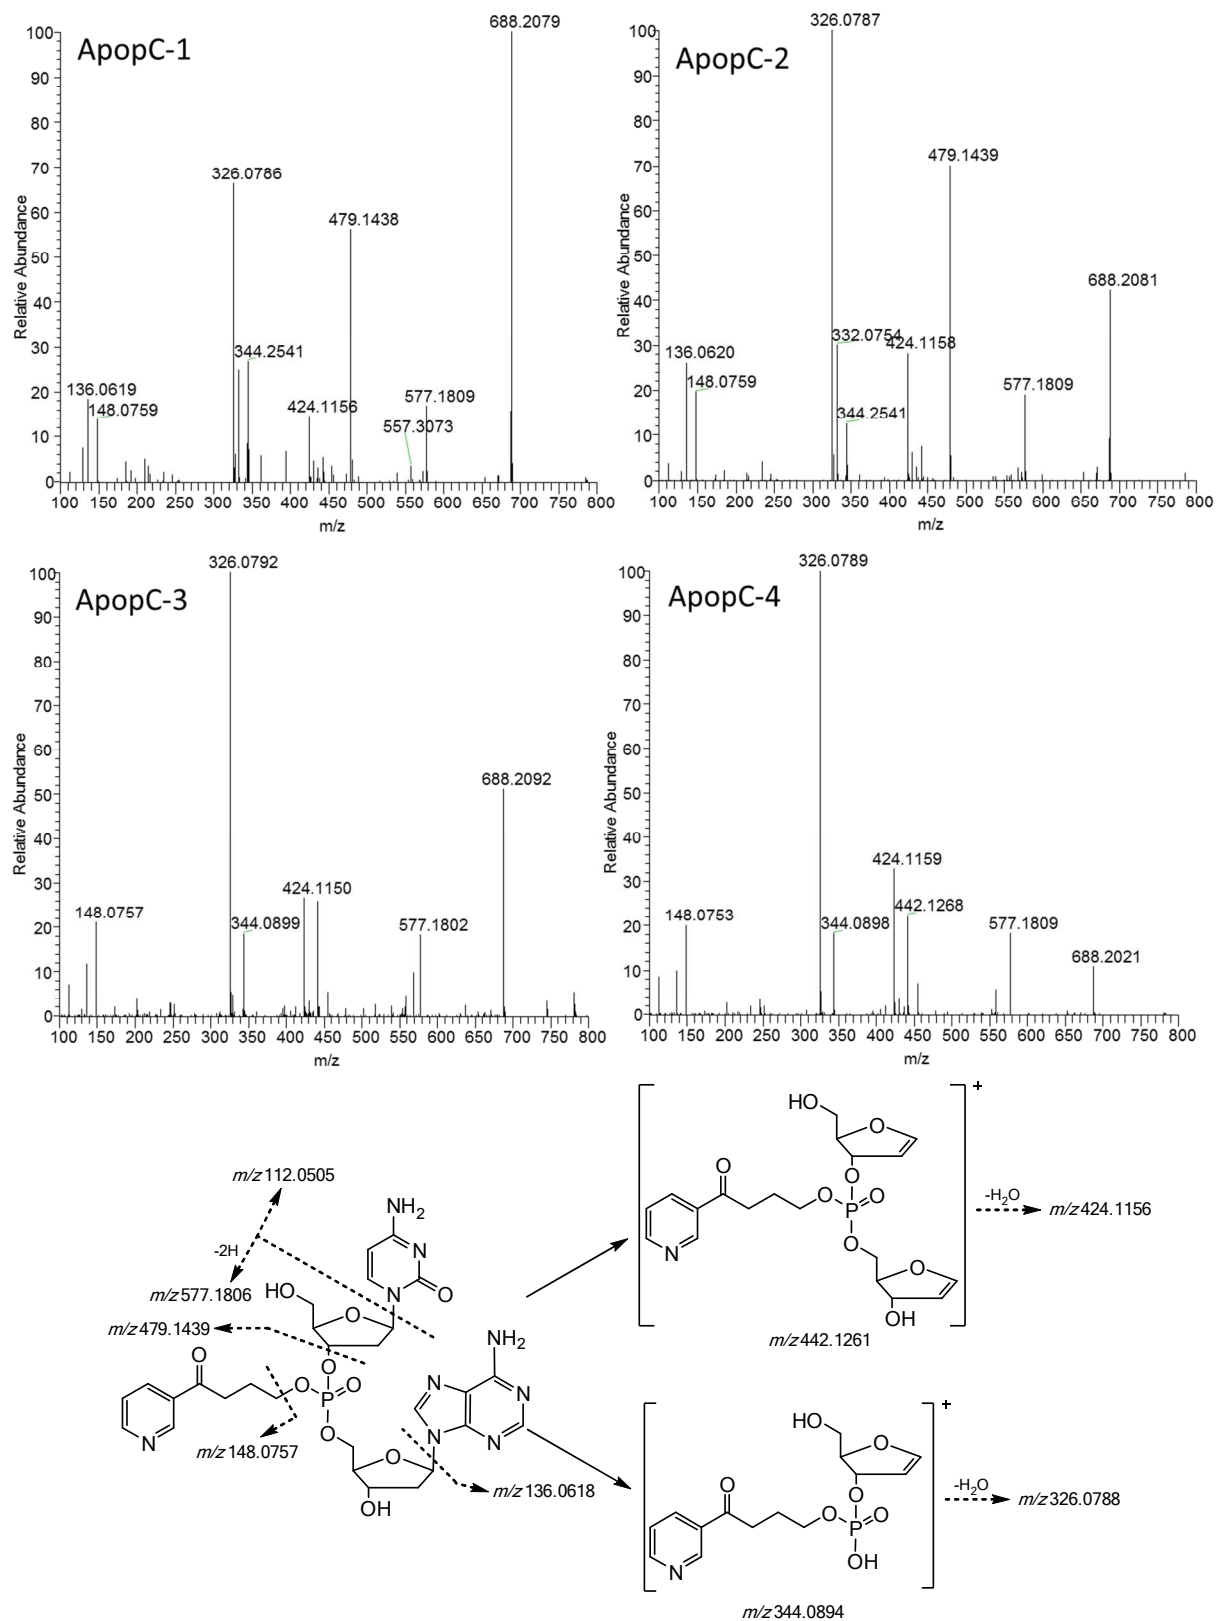

**Figure S4.** The extracted ion chromatograms and fragmentation patterns of B<sub>1</sub>popB<sub>2</sub> PTEs in NNKOAc-treated CT-DNA.

## ApopA

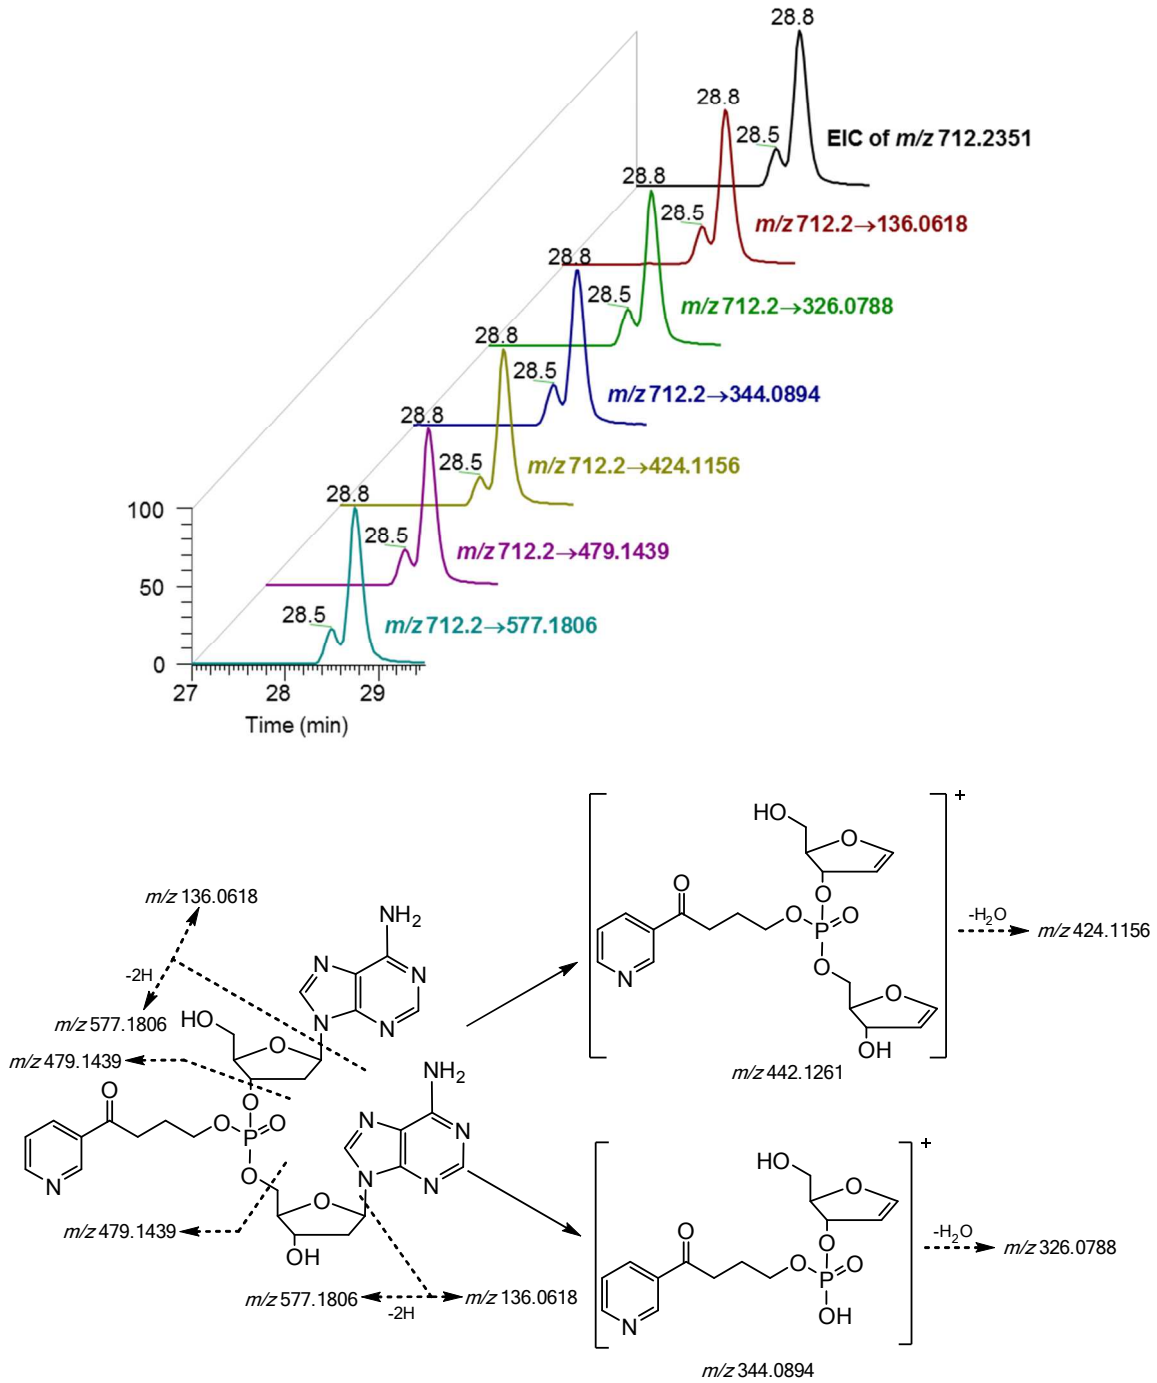

Figure S4. (Continued)

## GpopG

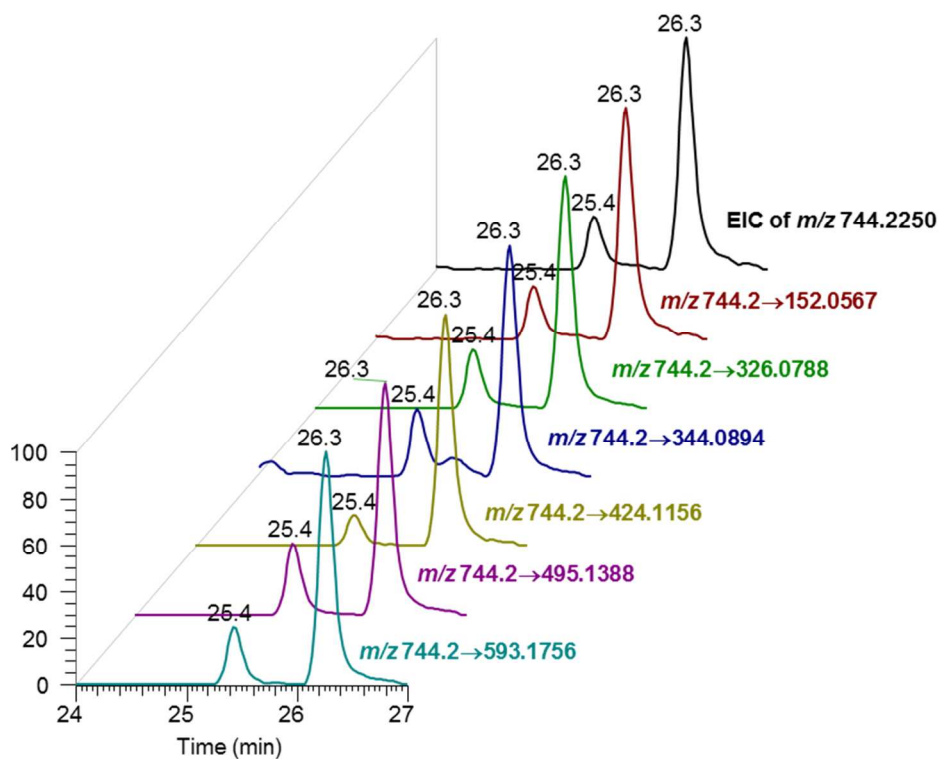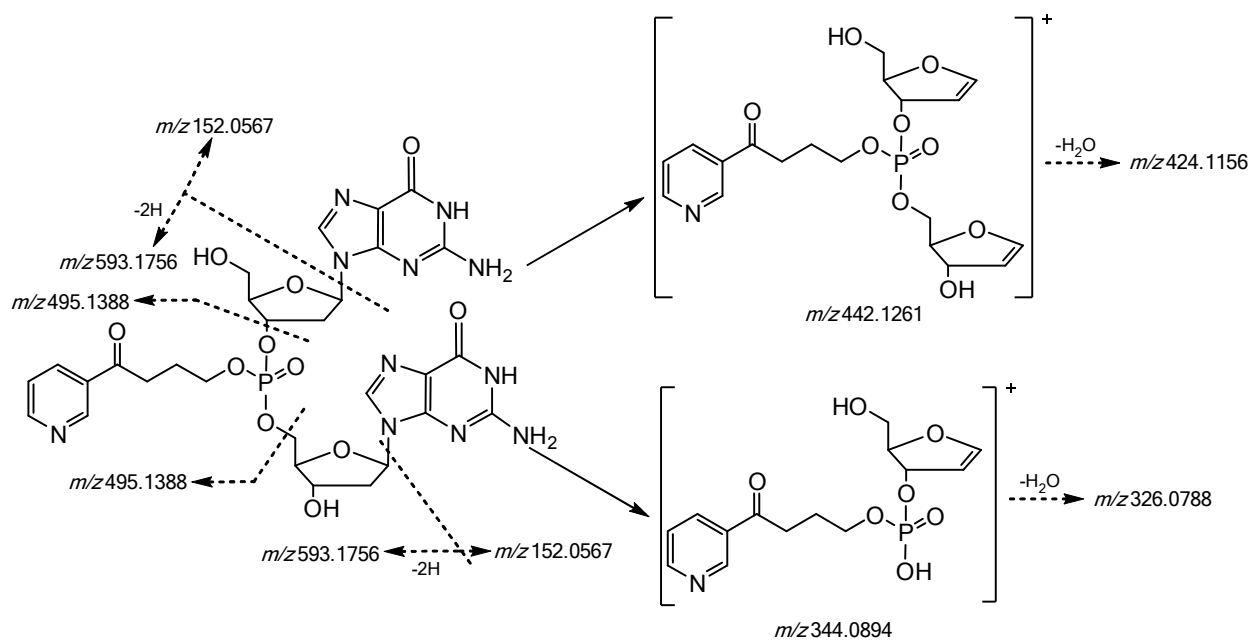

Figure S4. (Continued)

# TpopT

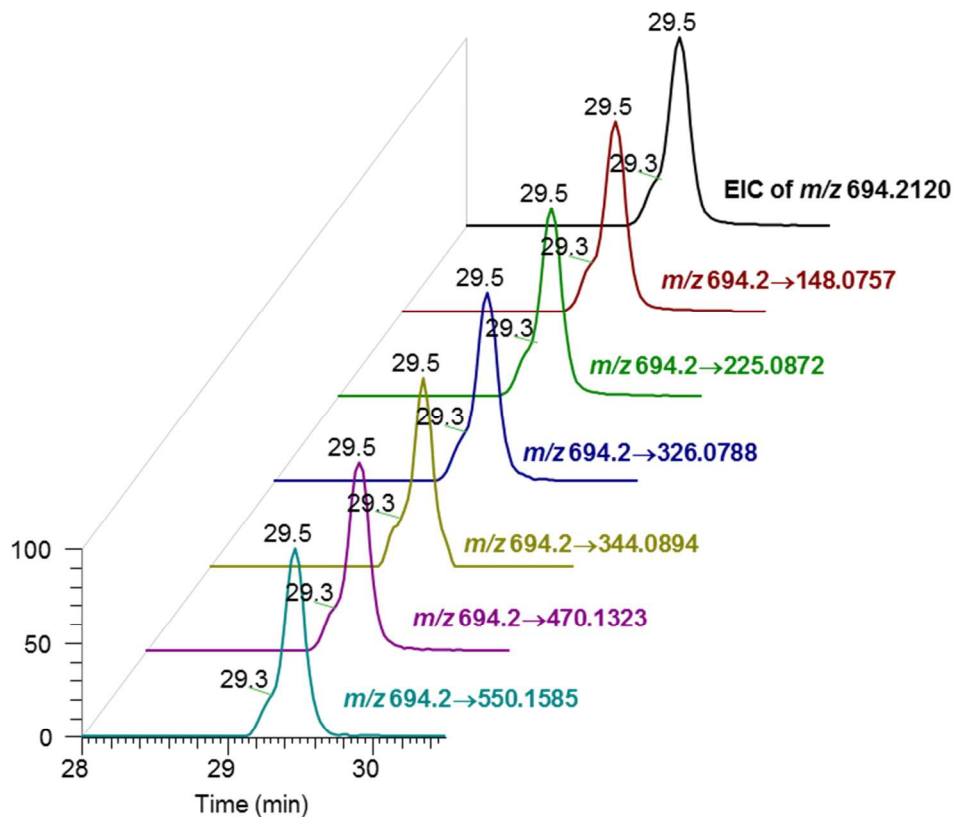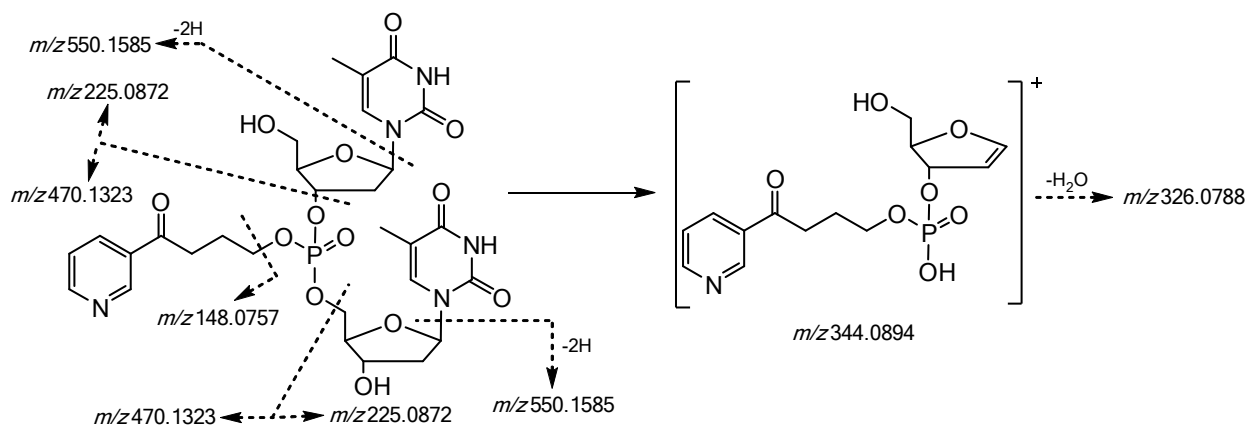

Figure S4. (Continued)

# ApopG

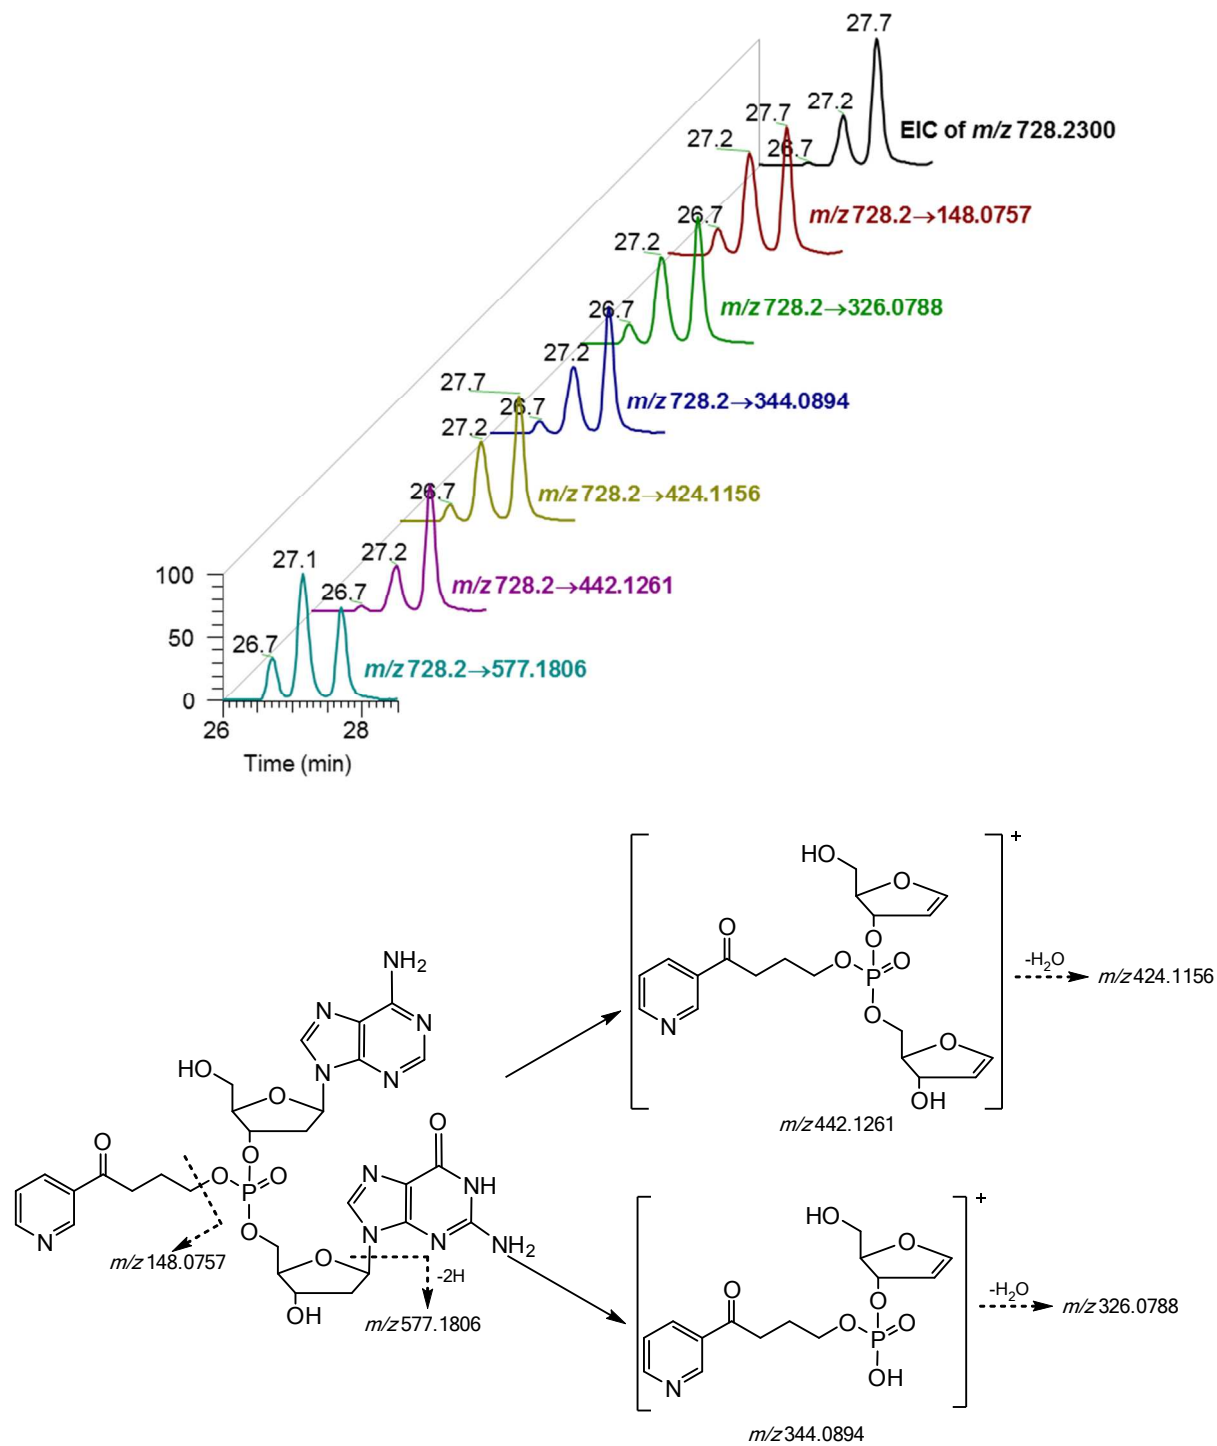



Figure S4. (Continued)

# Apopt

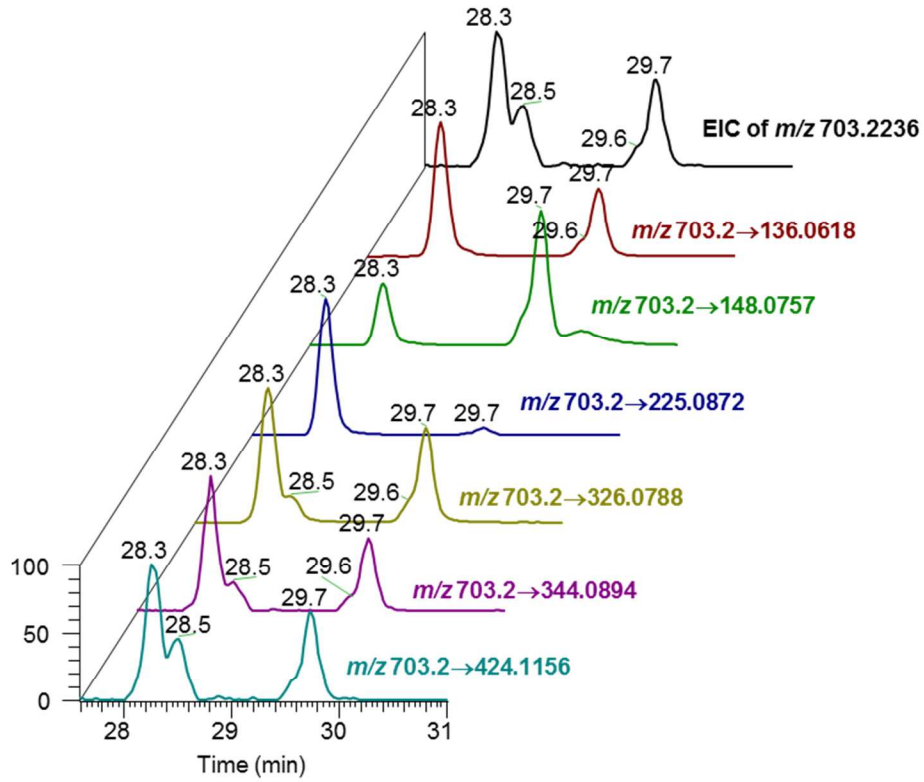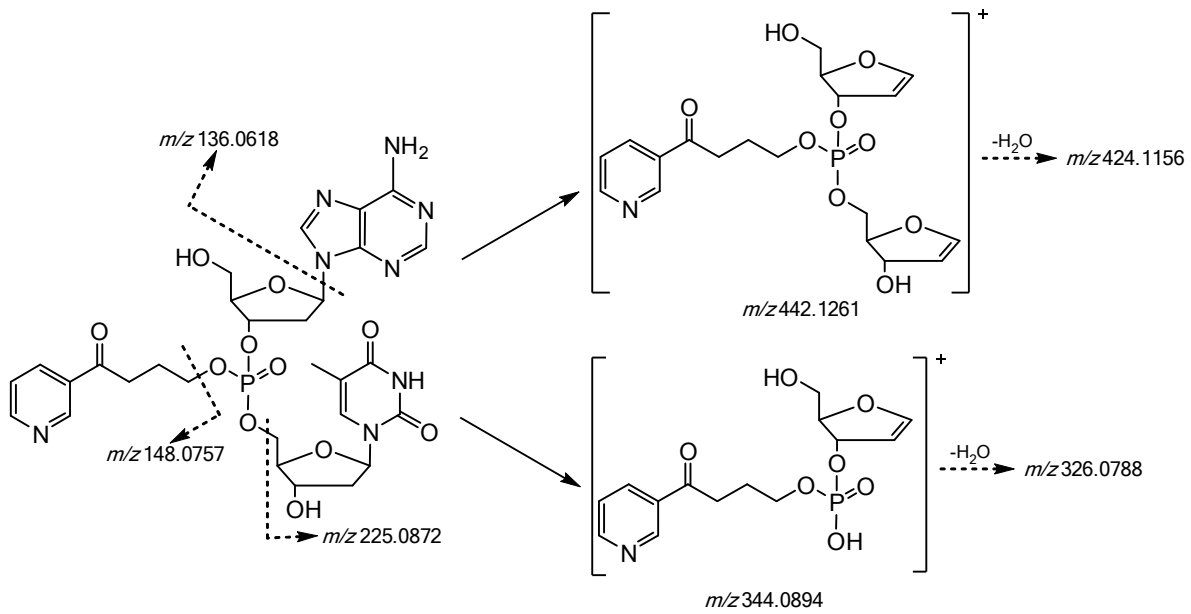

Figure S4. (Continued)

# CpopG

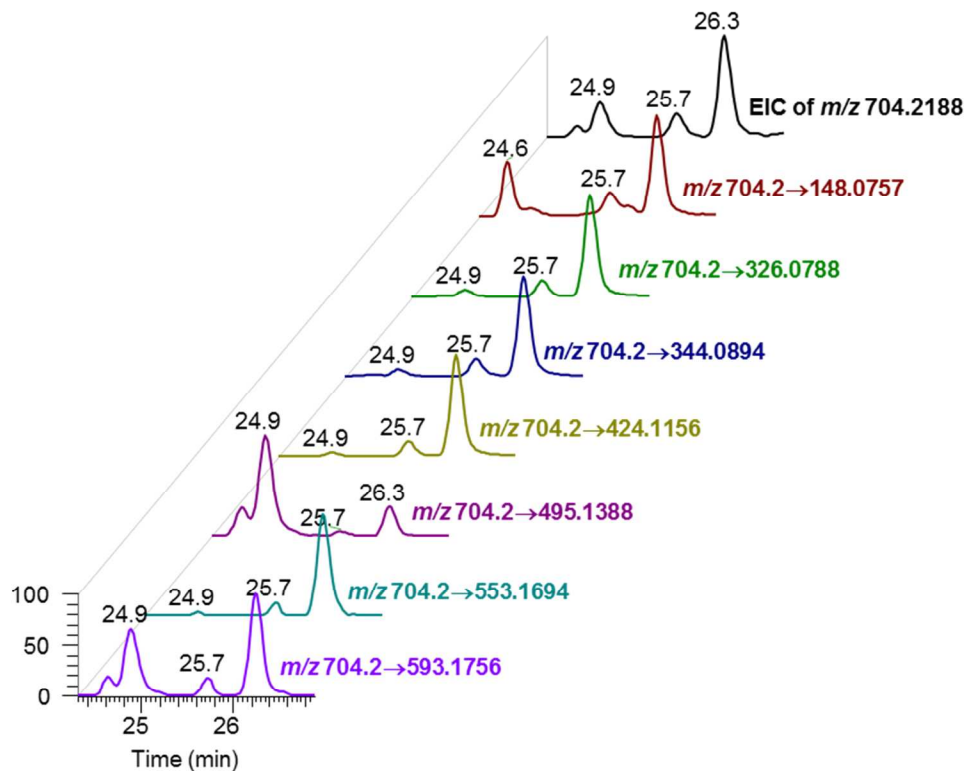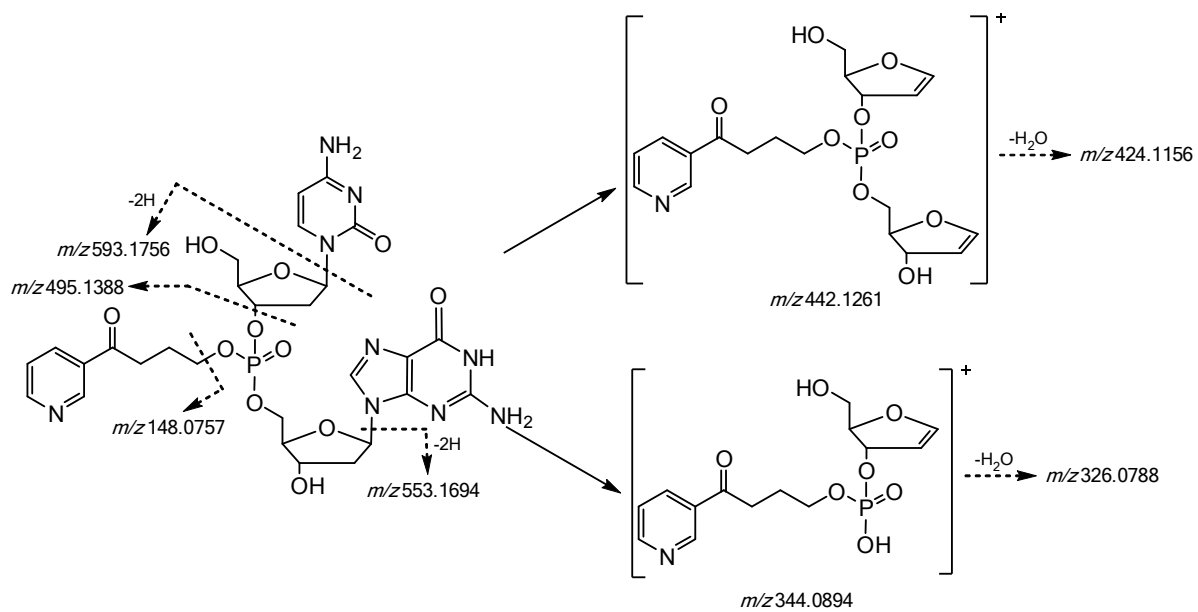

Figure S4. (Continued)

CpopT

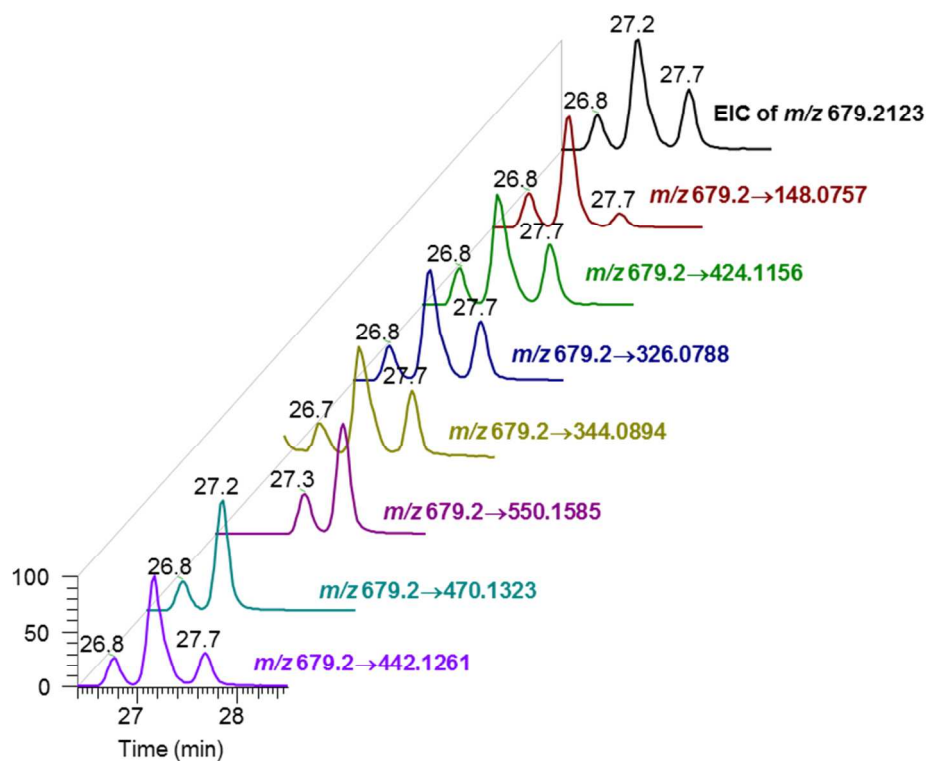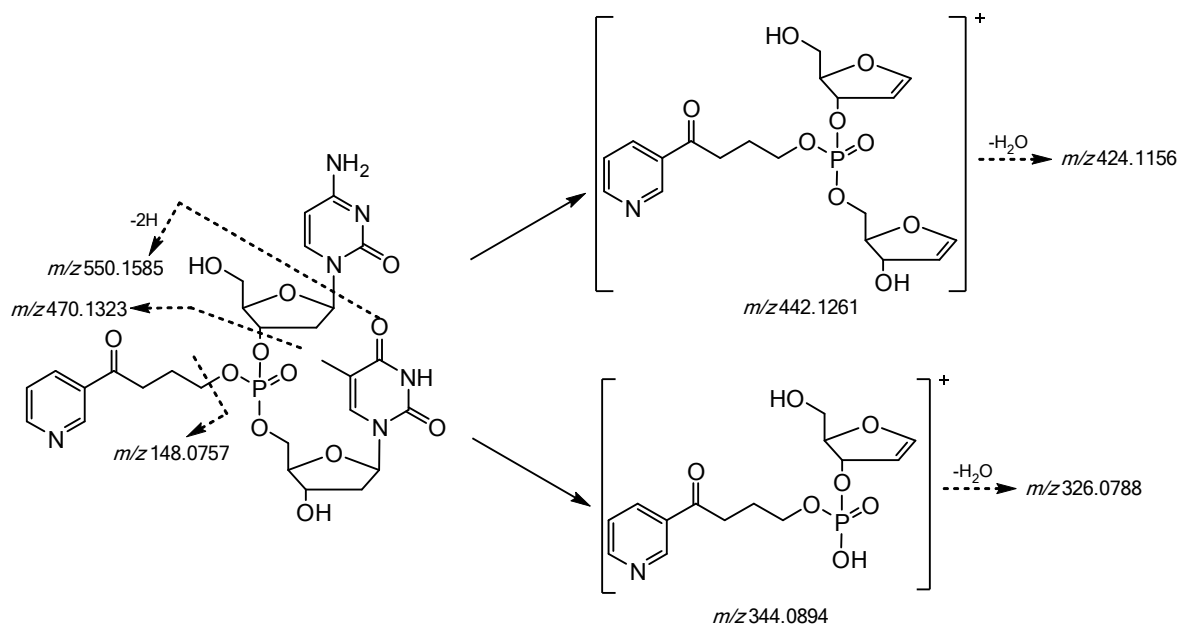

Figure S4. (Continued)

## GpopT

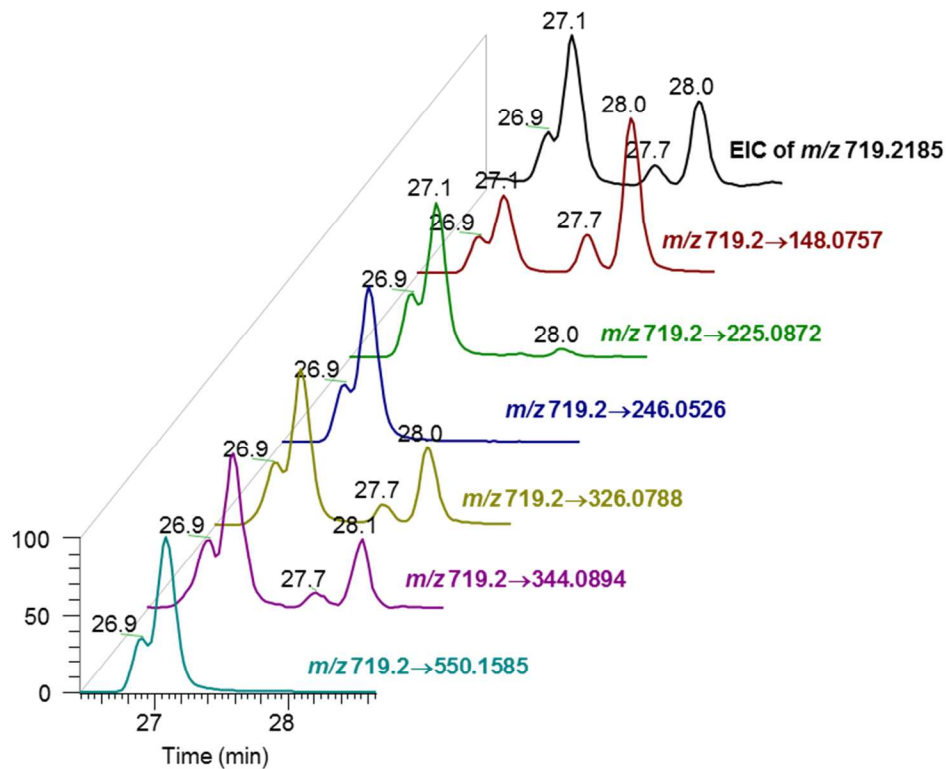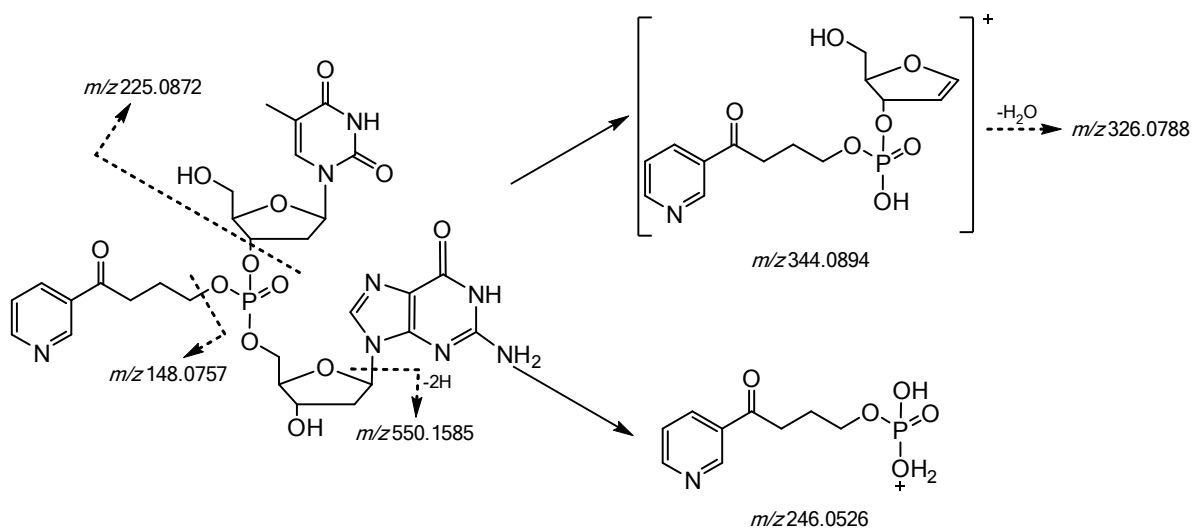

**Scheme S3.** Structure of B<sub>1</sub>p[2-(3-pyridyl)-2,3,4,5-tetrahydrofuranyl]B<sub>2</sub>.

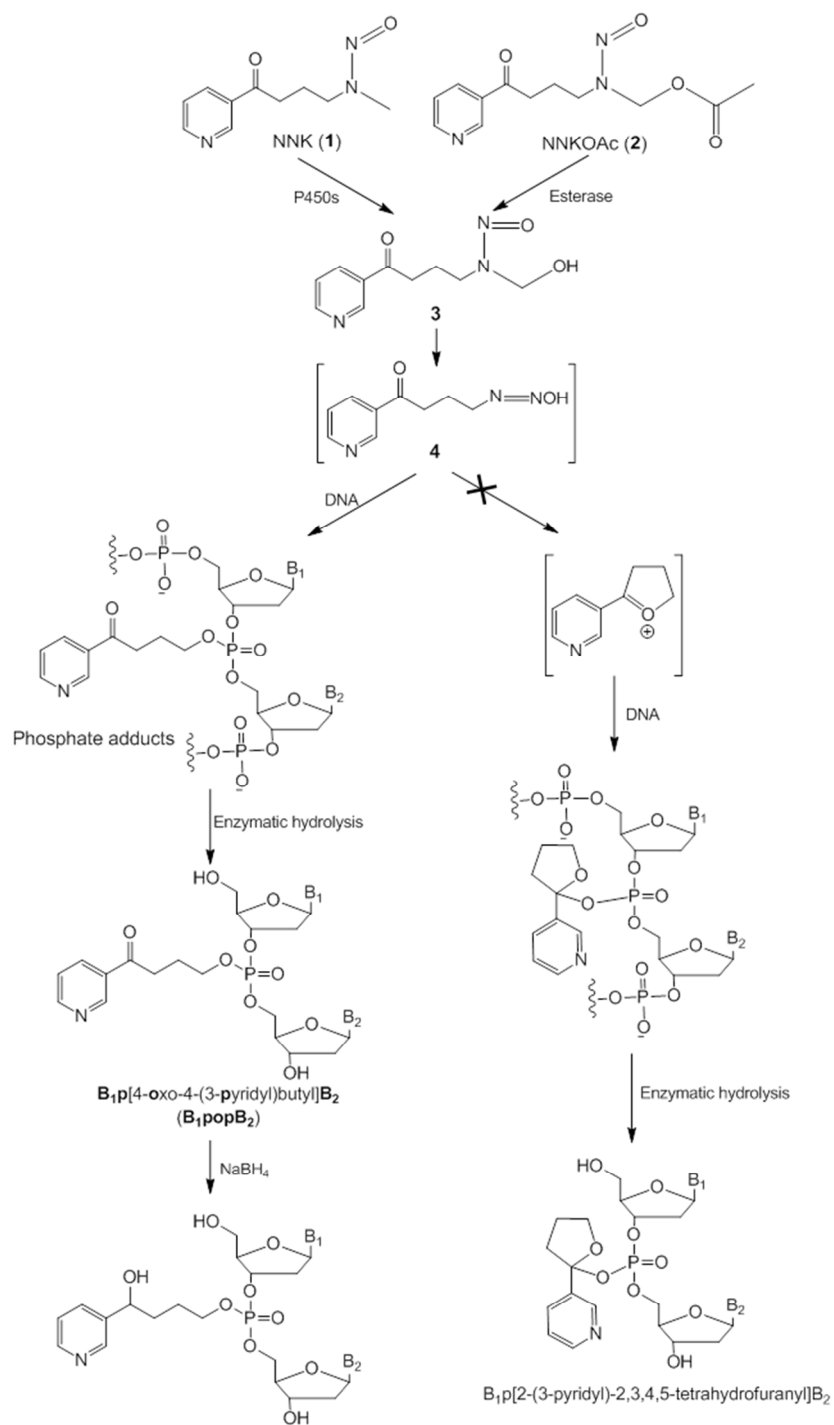

Table S1. The B<sub>1</sub>popB<sub>2</sub> PTEs detected in rats acutely and chronically treated with NNK.

| PTE   | Isomer number |                 |                   |      |
|-------|---------------|-----------------|-------------------|------|
|       | Possibility   | Detected        |                   |      |
|       |               | Acute treatment | Chronic treatment |      |
|       |               | Liver           | Liver             | Lung |
| ApopA | 2             | 2               | 2                 | 2    |
| CpopC | 2             | 2               | 2                 | 2    |
| GpopG | 2             | 2               | 1                 | 2    |
| TpopT | 2             | 2               | 2                 | 2    |
| ApopC | 4             | 4               | 3                 | 3    |
| ApopG | 4             | 3               | 3                 | 3    |
| ApopT | 4             | 2               | 3                 | 3    |
| CpopG | 4             | 2               | 2                 | 2    |
| CpopT | 4             | 3               | 3                 | 2    |
| GpopT | 4             | 3               | 2                 | 2    |
| Total | 32            | 25              | 23                | 23   |

**Figure S5.** Levels of DNA phosphate adducts in liver (A) and lung (B) DNA of NNK-treated rats in the chronic exposure group (5 ppm in drinking water for 30, 50 and 70 weeks)

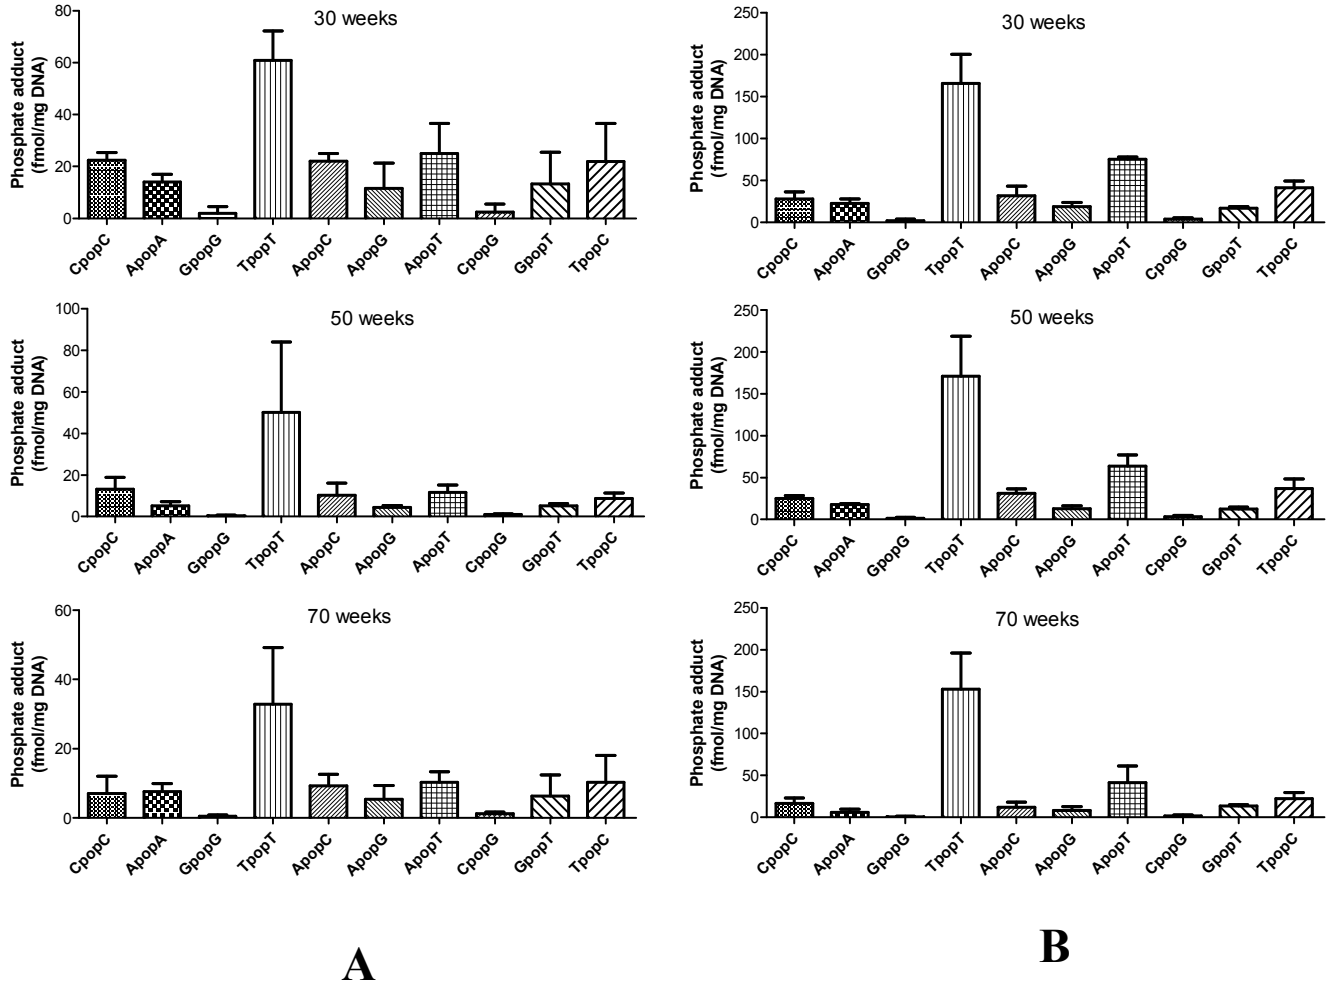

**Figure S6.** Levels of DNA phosphate adducts in liver (A) and lung (B) DNA from NNK-treated rats in the chronic exposure group (5 ppm in drinking water for 10, 30, 50 and 70 weeks)

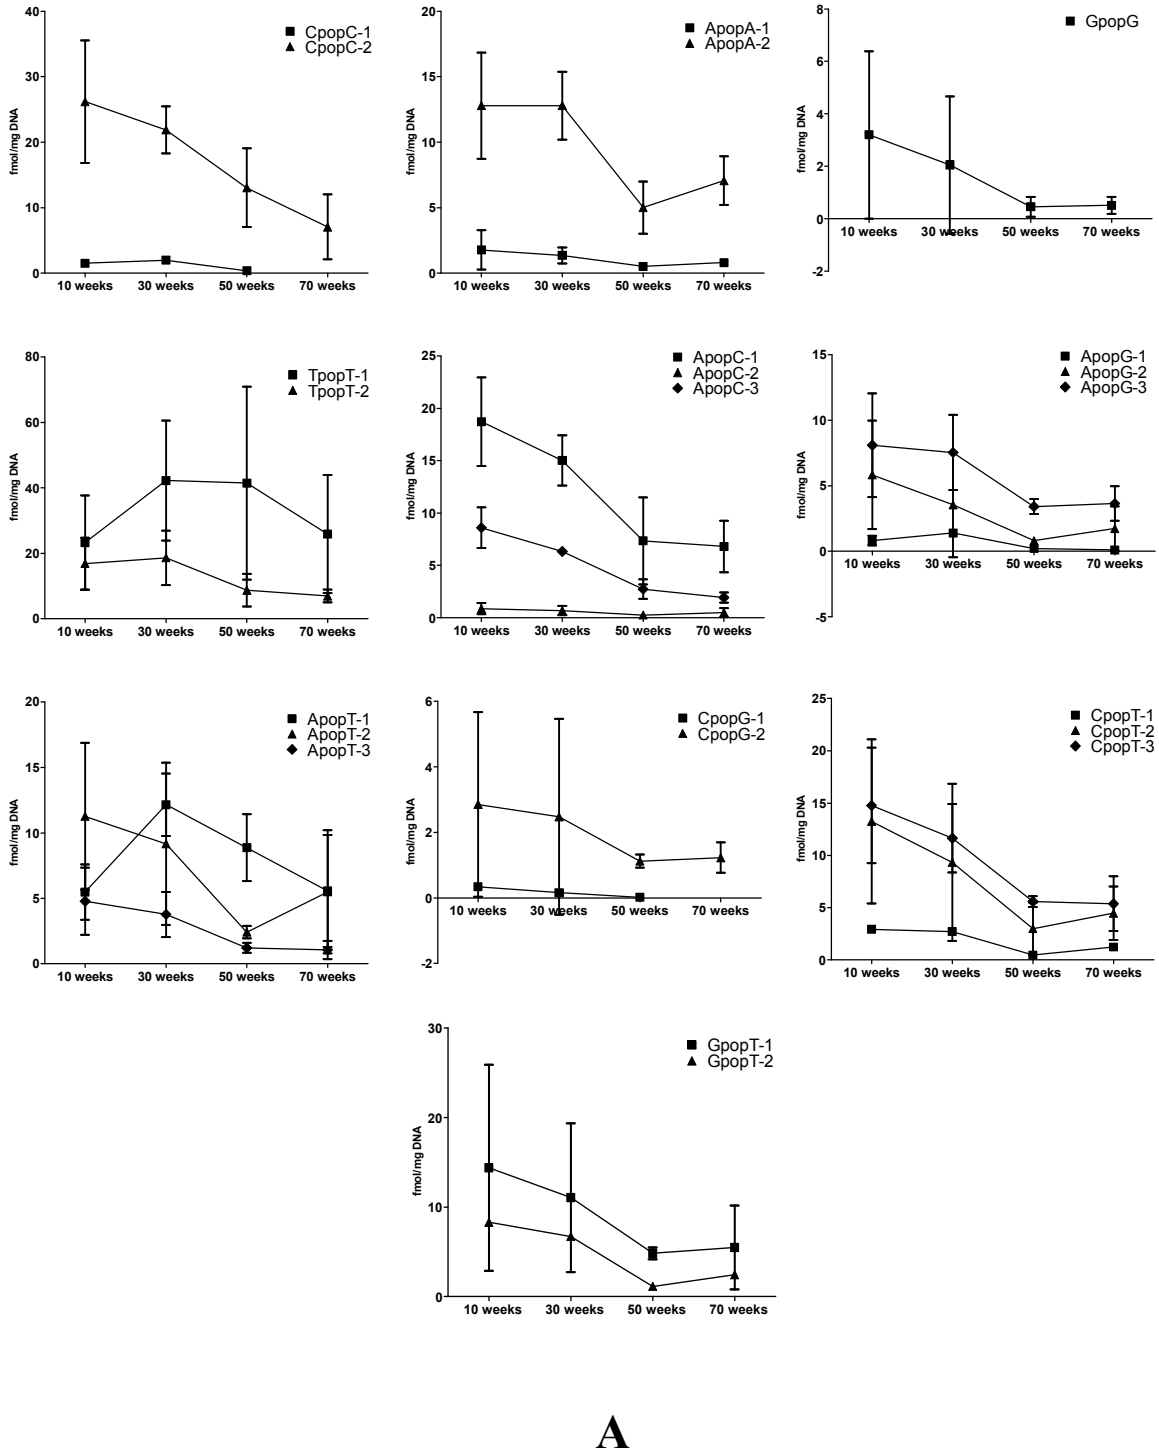



Figure S6. (Continued)

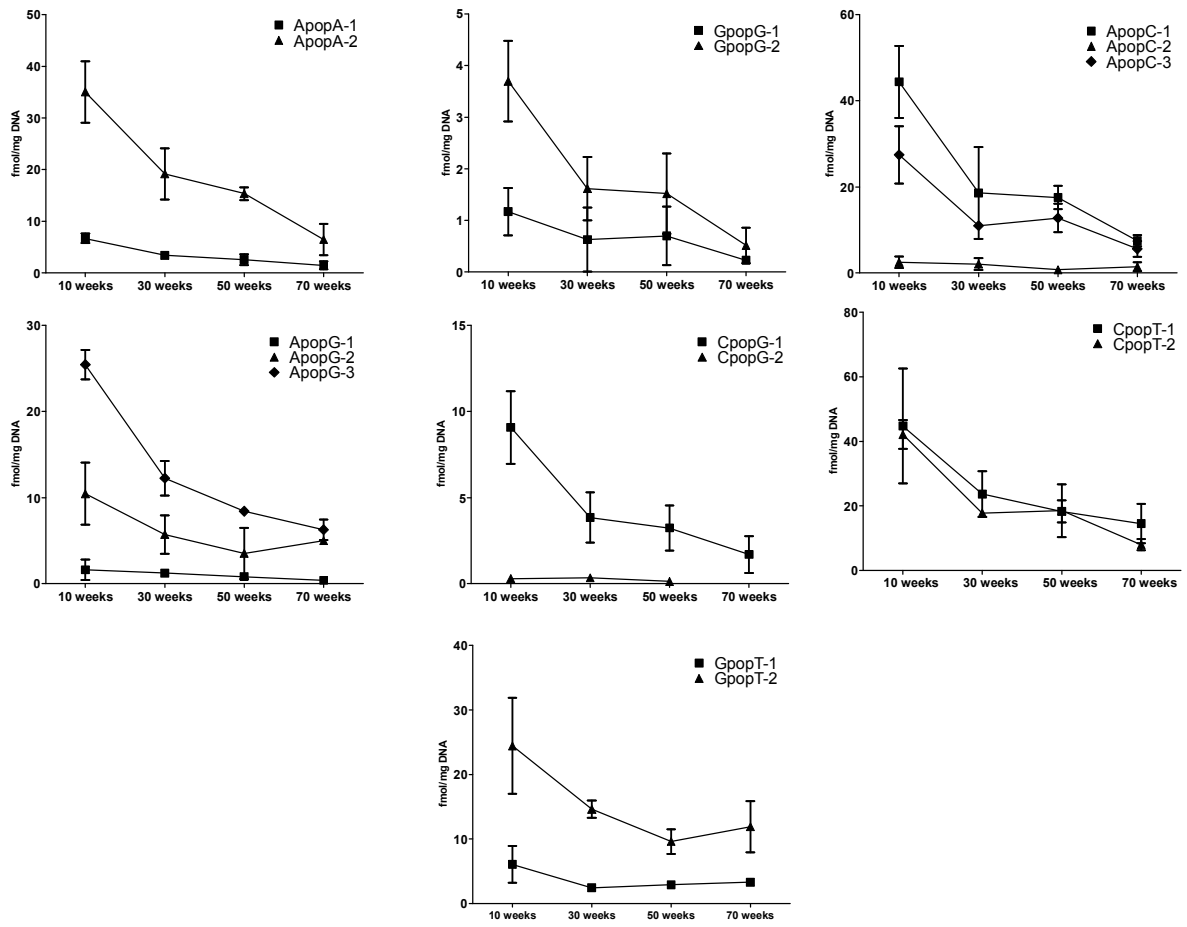

B

**Table S2.** Levels of three major POB adducts and total DNA phosphate adducts in NNKOAc-treated CT-DNA, in liver DNA from NNK-treated rats in the acute exposure group (0.1 mmol/kg per day for 4 days), liver and lung DNA of NNK-treated rats in the chronic exposure group (5 ppm in drinking water for 10 weeks)

| Group                                           | POB adduct (fmol/mg DNA)      |              |                               | Total phosphate adduct<br>(fmol/mg DNA) |
|-------------------------------------------------|-------------------------------|--------------|-------------------------------|-----------------------------------------|
|                                                 | <i>O</i> <sup>6</sup> -POB-dG | 7-POB-G      | <i>O</i> <sup>2</sup> -POB-dT |                                         |
| NNKOAc-treated<br>DNA                           | 808607                        | 1178653      | 1080774                       | 170420                                  |
| NNK (0.1mmol/kg)-<br>treated rat liver DNA      | 2048 ± 254                    | 26222 ± 1174 | 19301 ± 2503                  | 20018 ± 5626                            |
| NNK (5ppm)-treated<br>rat liver DNA             |                               |              |                               |                                         |
| 10 weeks                                        | <LOQ                          | 501 ± 53     | 1808 ± 840                    | 190 ± 49                                |
| 30 weeks                                        | <LOQ                          | 331 ± 36     | 2144 ± 26                     | 134 ± 64                                |
| 50 weeks                                        | <LOQ                          | 257 ± 32     | 1531 ± 161                    | 120 ± 36                                |
| 70 weeks                                        | <LOQ                          | 230 ± 90     | 910 ± 6                       | 89 ± 4                                  |
| NNK (5ppm)-treated<br>rat lung DNA <sup>a</sup> |                               |              |                               |                                         |
| 10 weeks                                        | 34 ± 21                       | 970 ± 148    | 3591 ± 414                    | 475 ± 95                                |
| 30 weeks                                        | 9 ± 9                         | 751 ± 29     | 4809 ± 193                    | 417 ± 43                                |
| 50 weeks                                        | 9 ± 2                         | 688 ± 65     | 4409 ± 320                    | 346 ± 41                                |
| 70 weeks                                        | 4 ± 2                         | 315 ± 75     | 1983 ± 467                    | 218 ± 15                                |

<sup>a</sup> The data of POB adduct levels are from Balbo, S., et al. *Carcinogenesis* **2014**, 35, 2798.
